# Supplementary material for: Spatiotemporal methods for estimating subsurface ocean thermal response to tropical cyclones
Source: Copernicus journal article supplement (doi:10.5194/ascmo-10-69-2024), 2024-07-22
Supplement: Supplementary file 1 [file ascmo-10-69-2024-supplement.pdf]

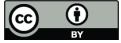

*Supplement of*

## **Spatiotemporal methods for estimating subsurface ocean thermal response to tropical cyclones**

**Addison J. Hu et al.**

*Correspondence to:* Addison J. Hu ([mail@huisaddison.com](mailto:mail@huisaddison.com))

The copyright of individual parts of the supplement might differ from the article licence.

In this supplemental document, we present a comprehensive set of figures to illustrate the coefficients and fits from the seasonal mean field, Gaussian process, and thin-plate spline models.

### S1 Seasonal mean field fits

Here we present the seasonal mean fields, as well as the raw and adjusted temperature differences, at all depths, for the entire set of profile pairs.

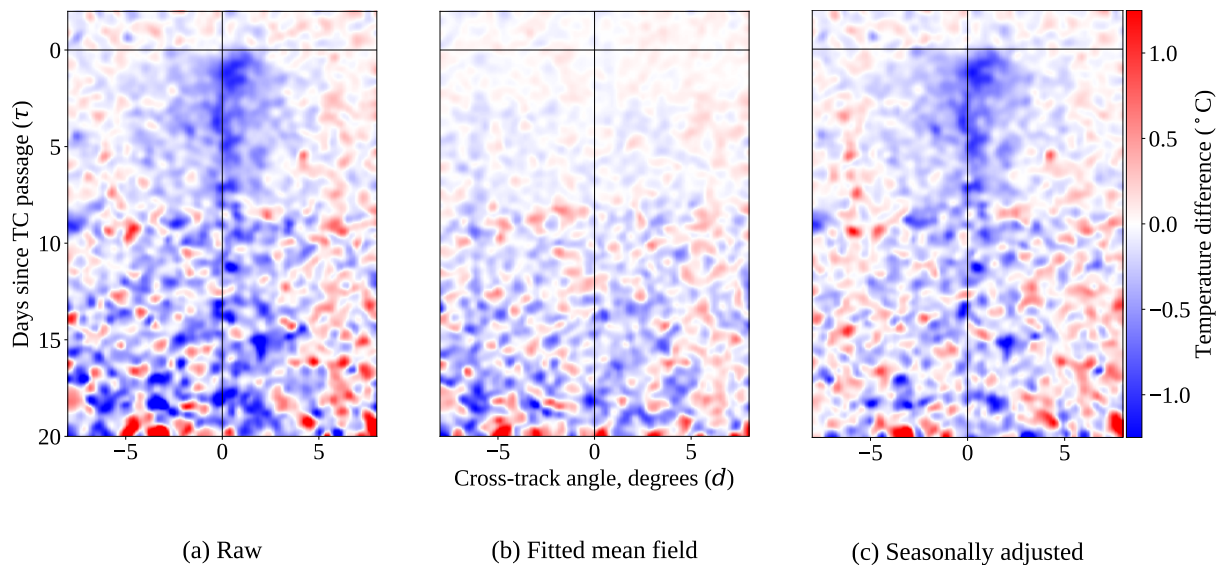

**Figure S1.** Pressure level: 10 dbar

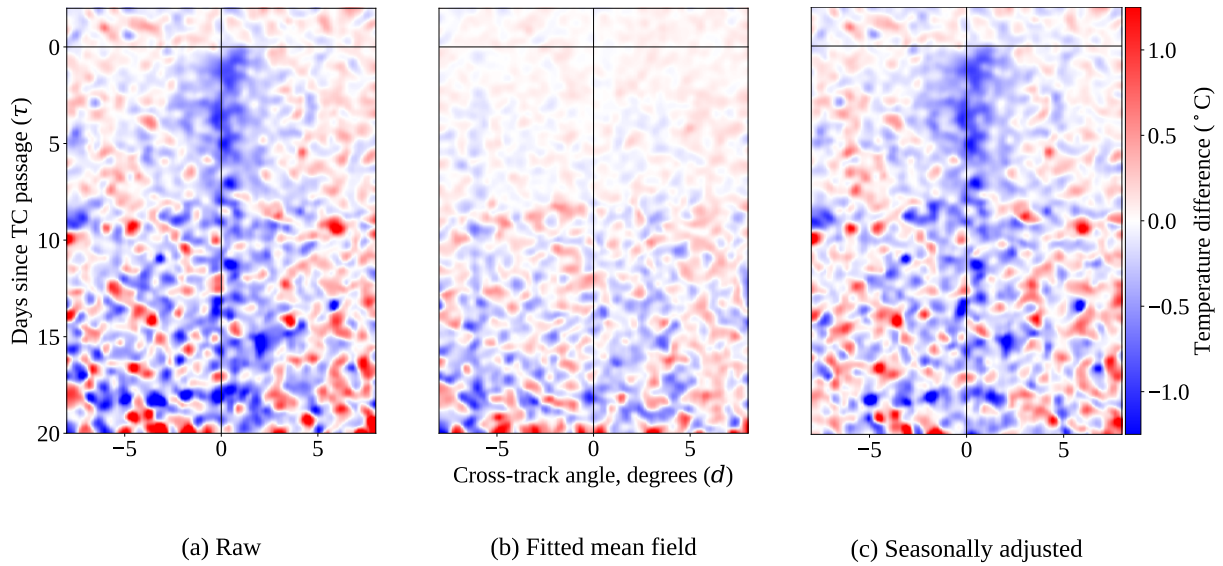

**Figure S2.** Pressure level: 20 dbar

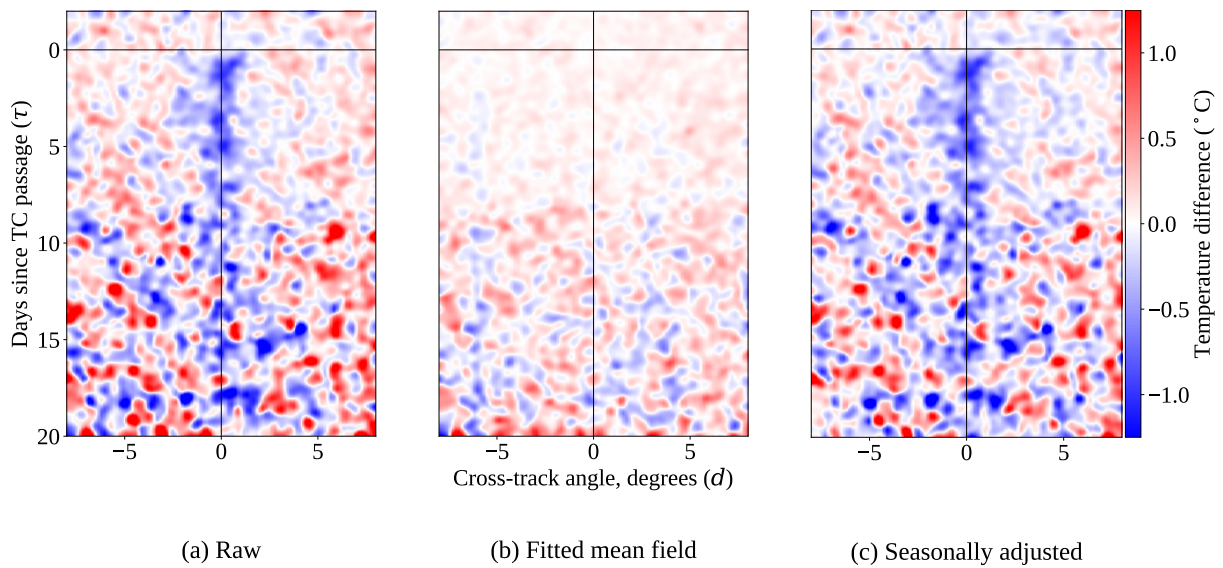

**Figure S3.** Pressure level: 30 dbar

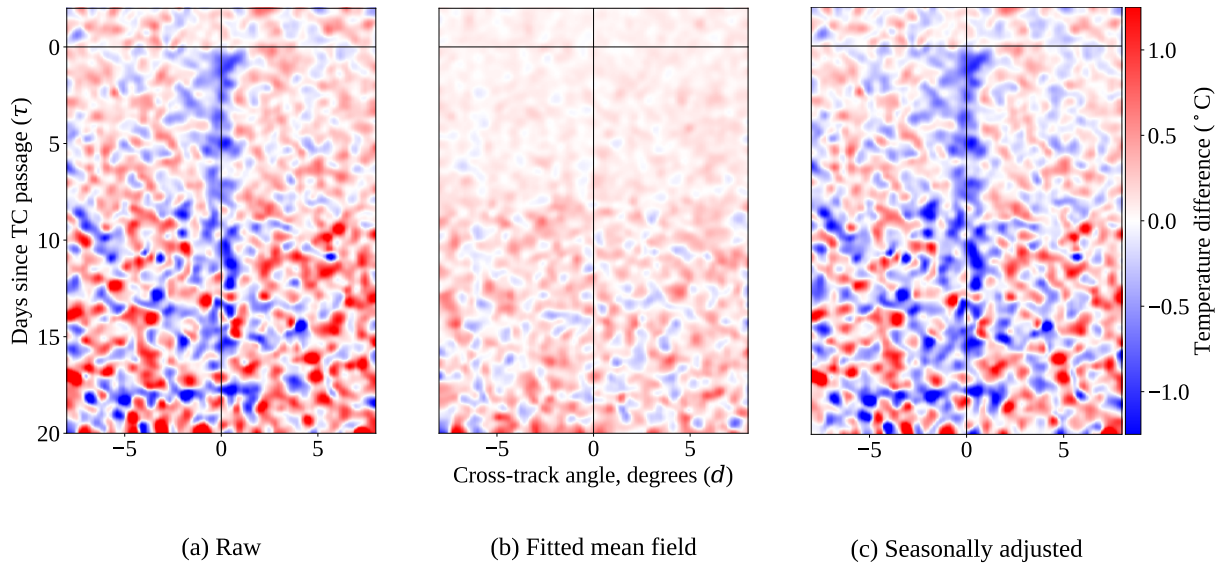

**Figure S4.** Pressure level: 40 dbar

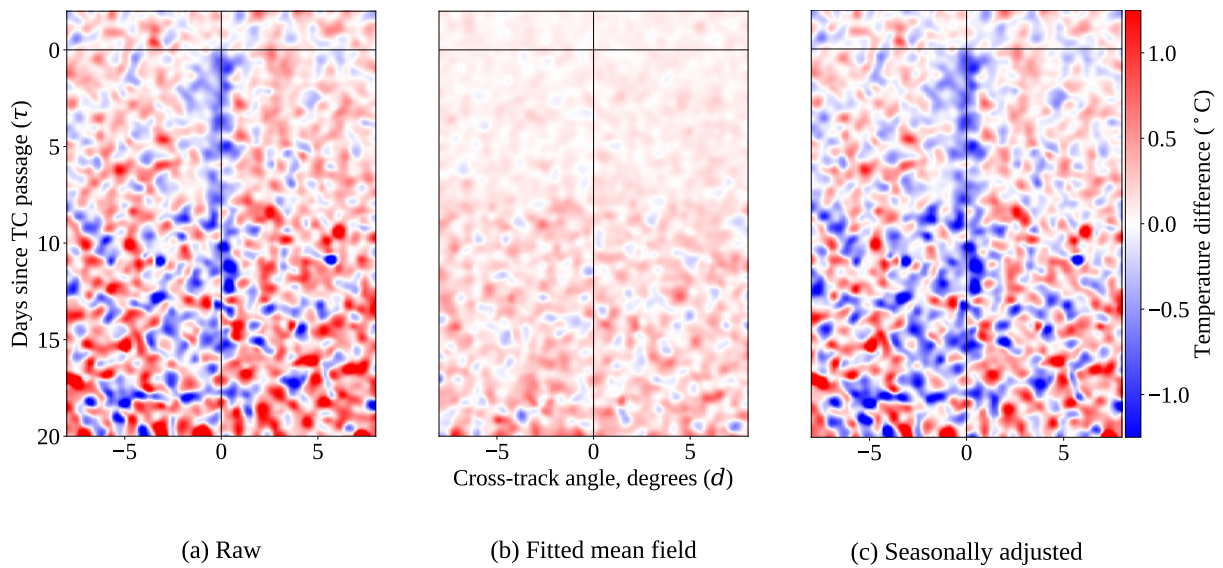

**Figure S5.** Pressure level: 50 dbar

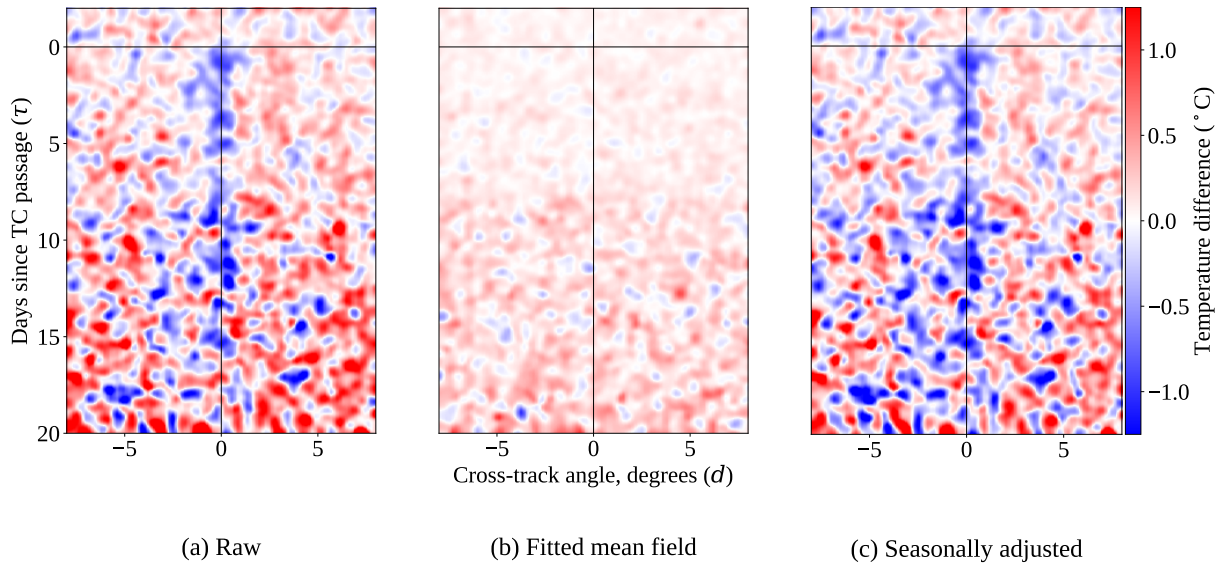

**Figure S6.** Pressure level: 60 dbar

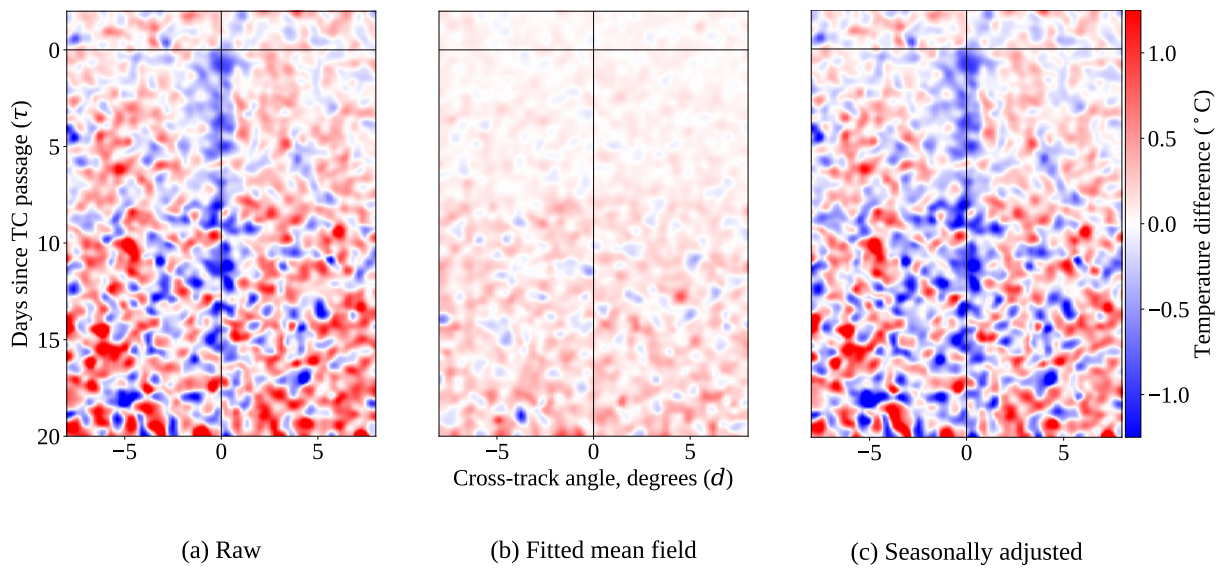

**Figure S7.** Pressure level: 70 dbar

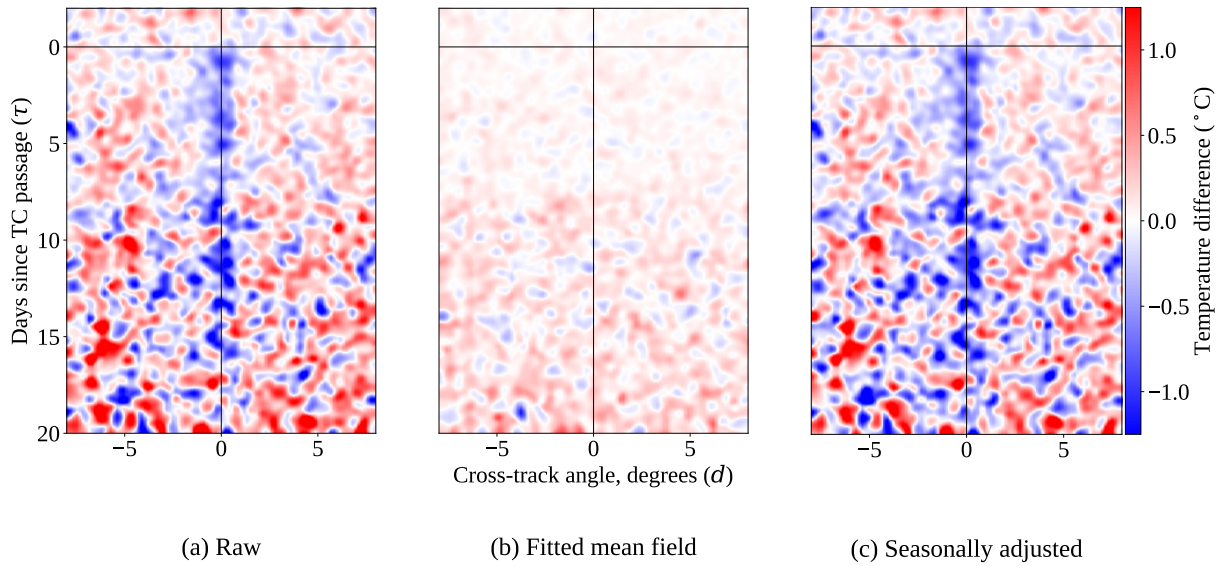

**Figure S8.** Pressure level: 80 dbar

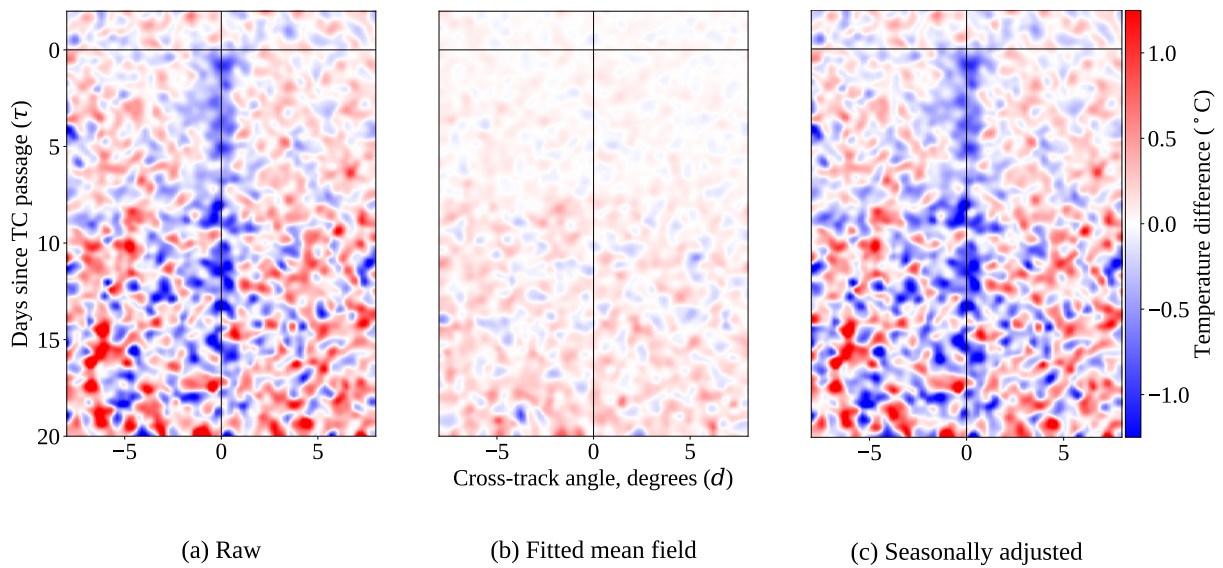

**Figure S9.** Pressure level: 90 dbar

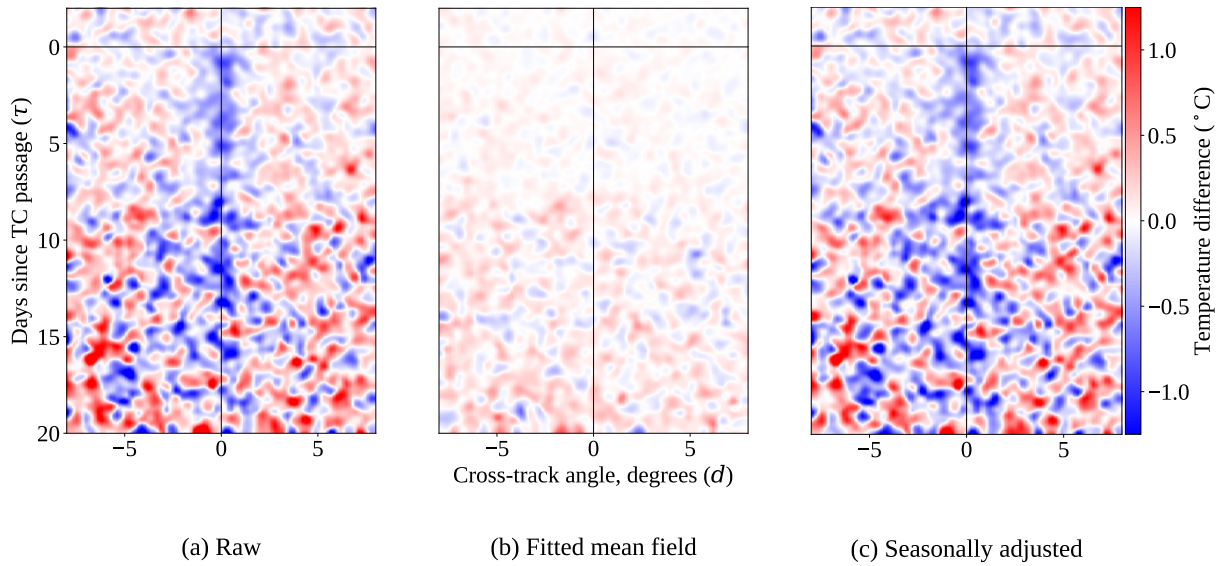

**Figure S10.** Pressure level: 100 dbar

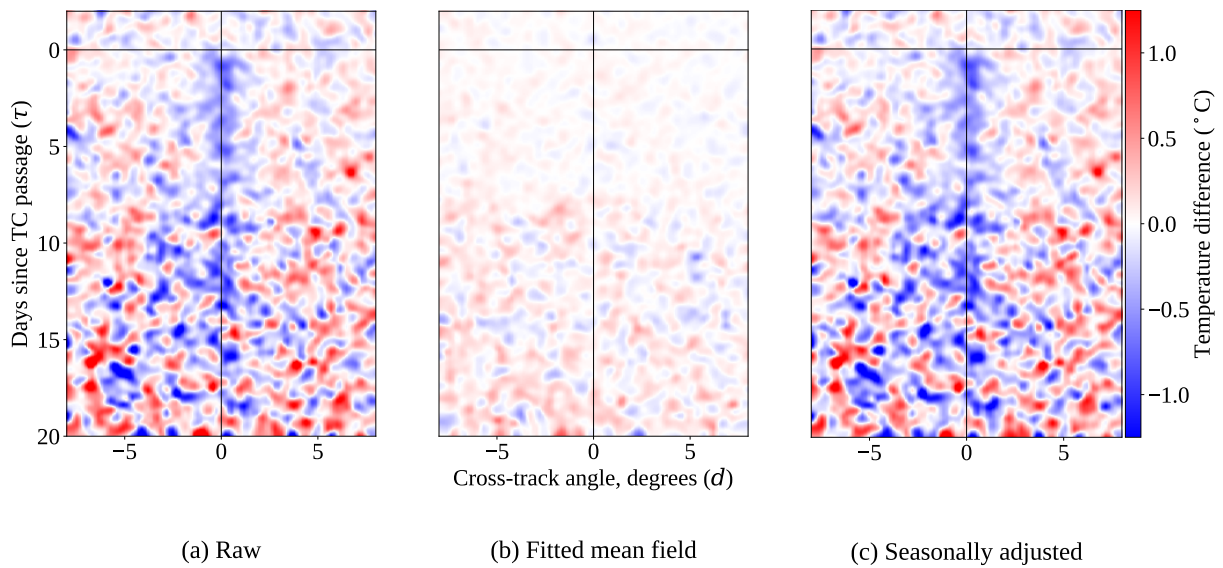

**Figure S11.** Pressure level: 110 dbar

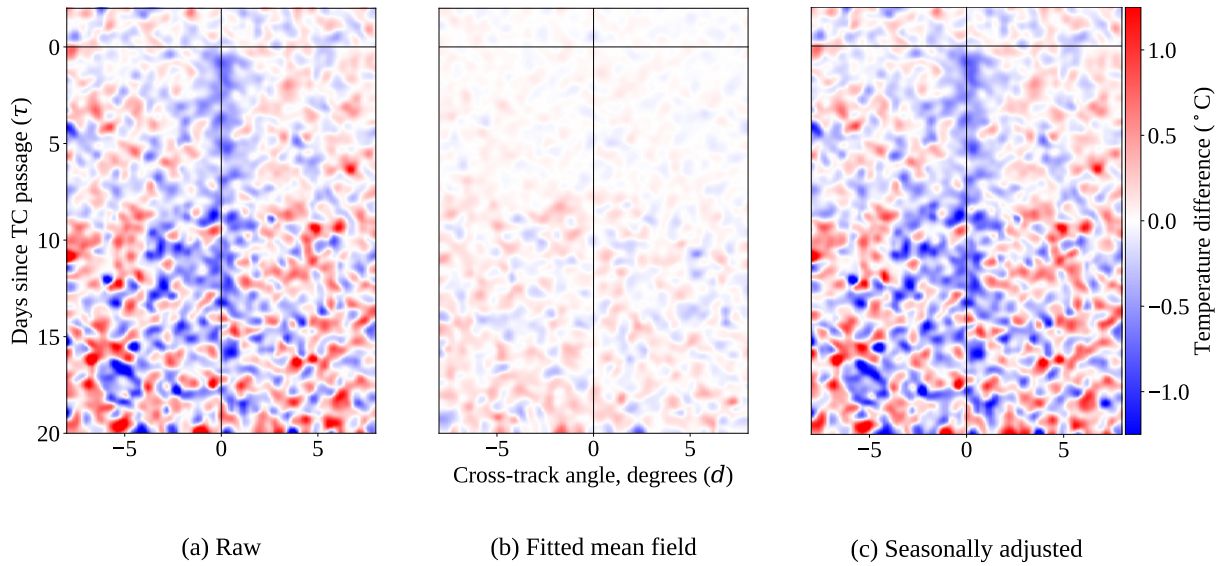

**Figure S12.** Pressure level: 120 dbar

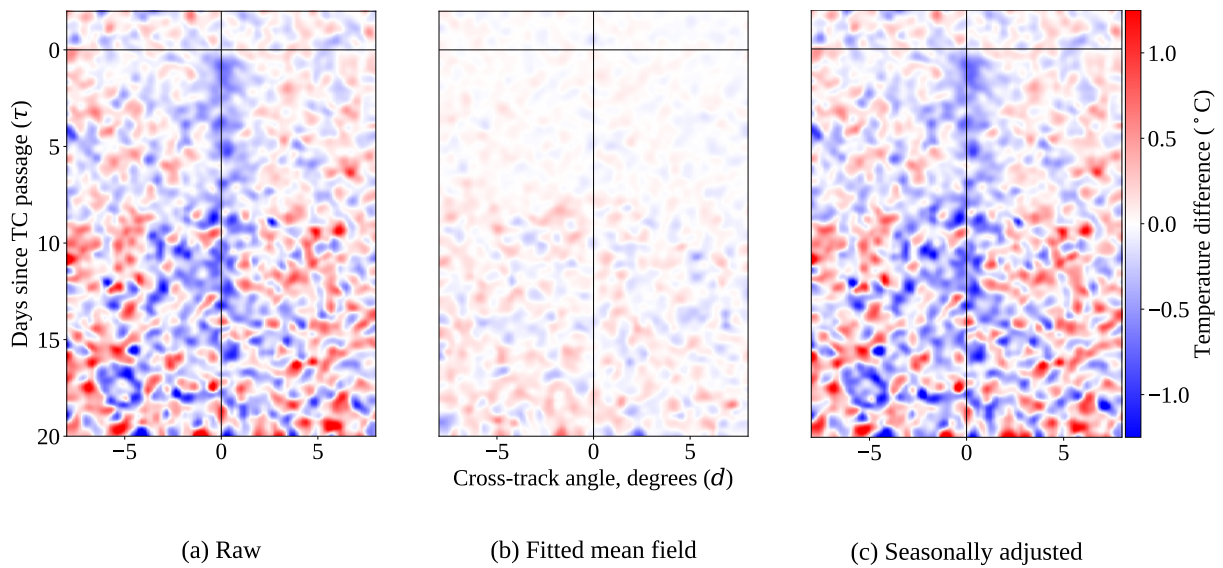

**Figure S13.** Pressure level: 130 dbar



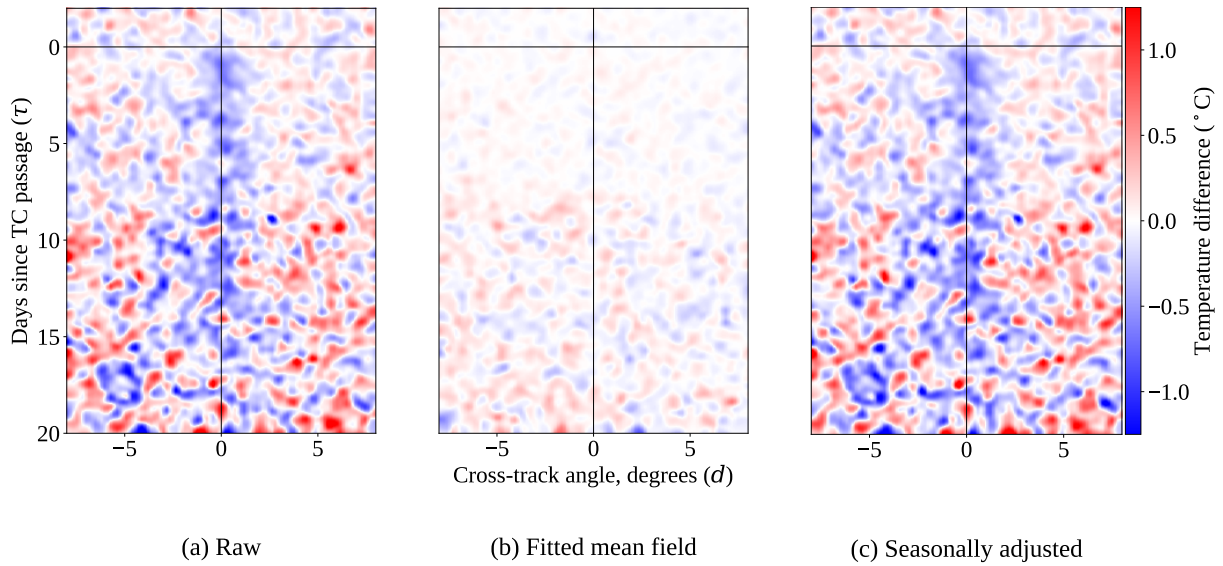

**Figure S14.** Pressure level: 140 dbar

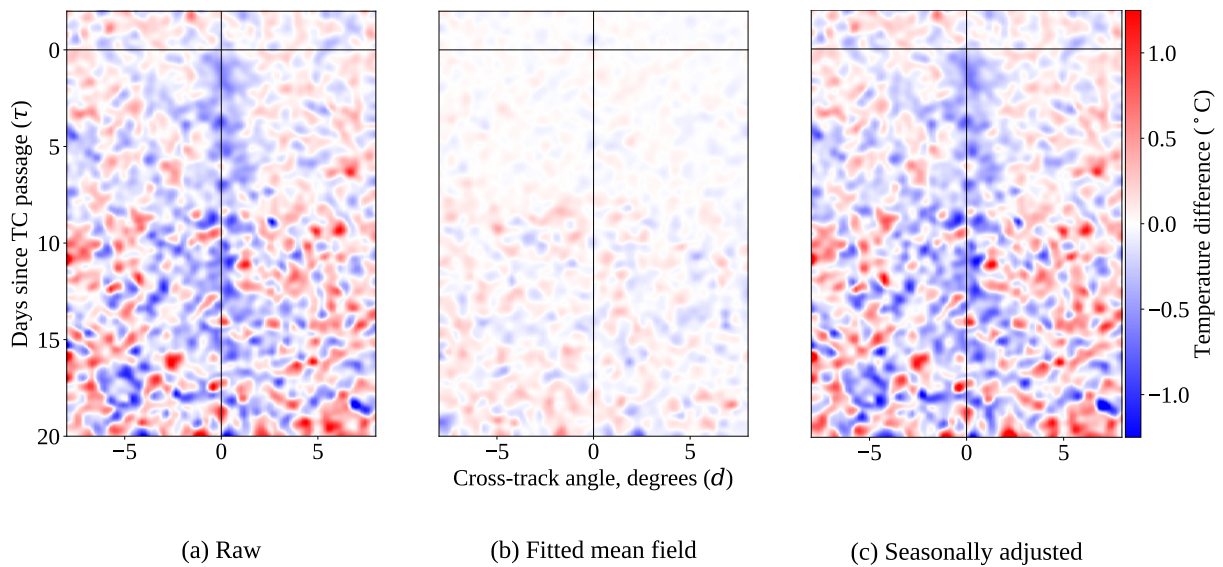

**Figure S15.** Pressure level: 150 dbar

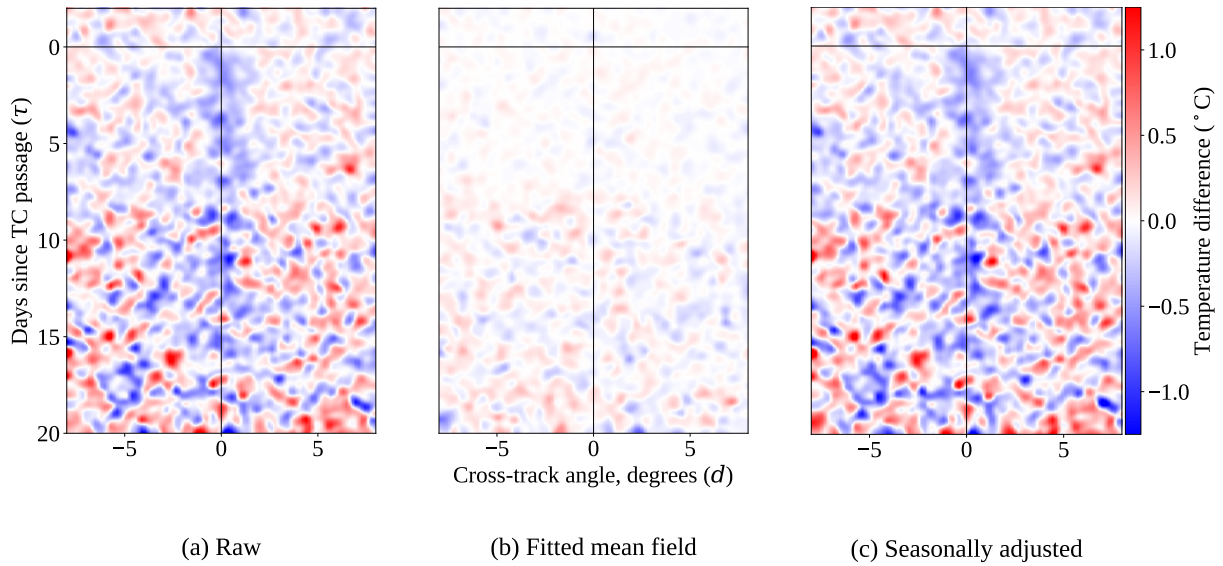

**Figure S16.** Pressure level: 160 dbar

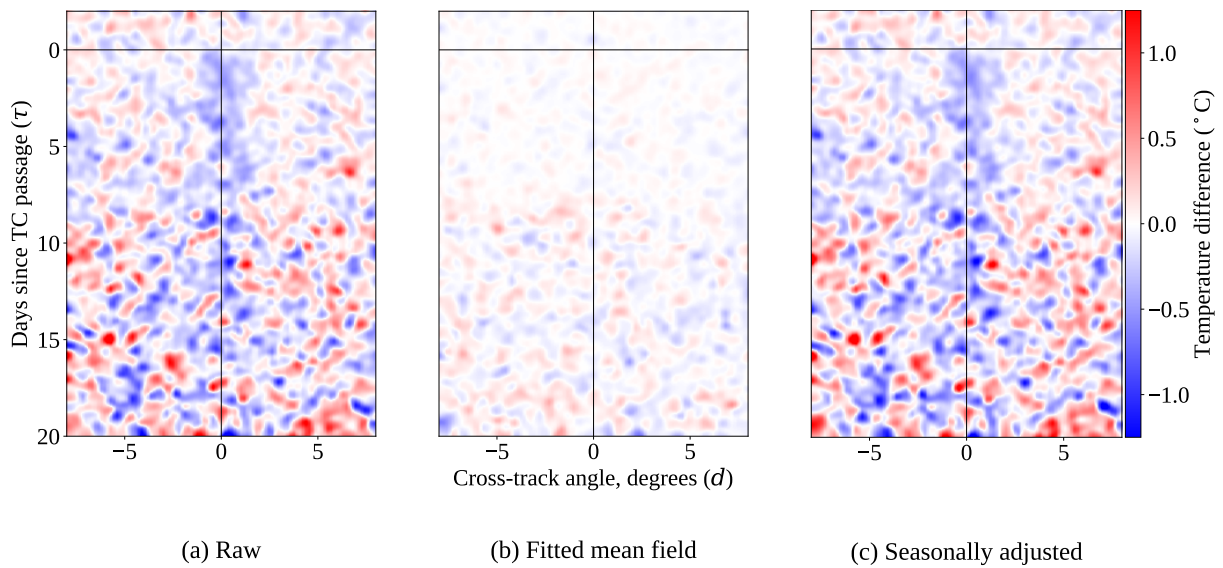

**Figure S17.** Pressure level: 170 dbar

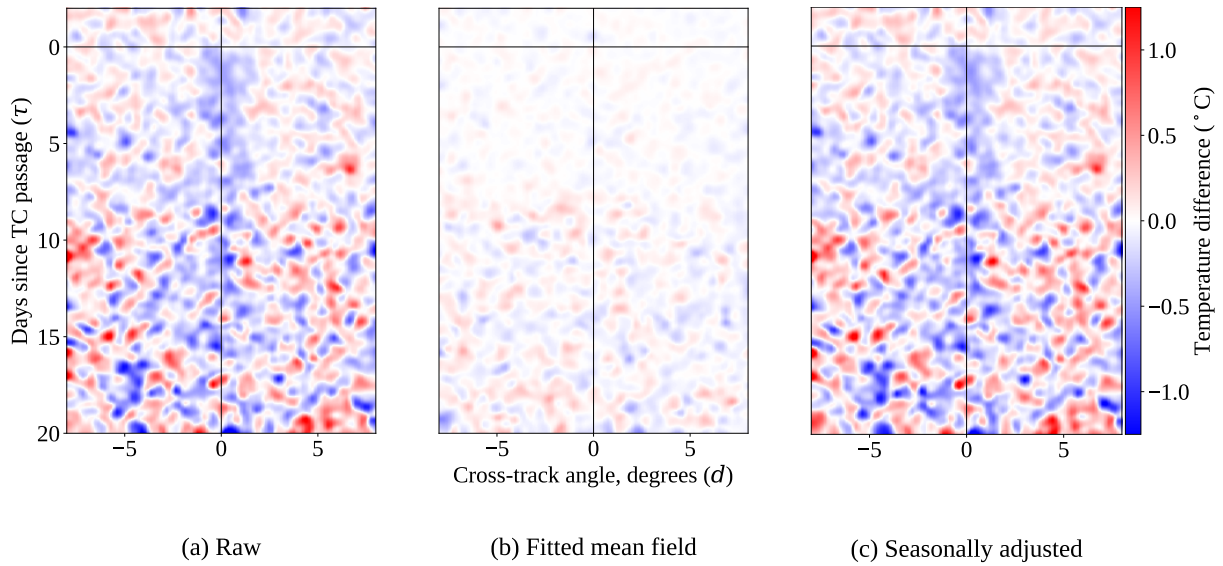

**Figure S18.** Pressure level: 180 dbar

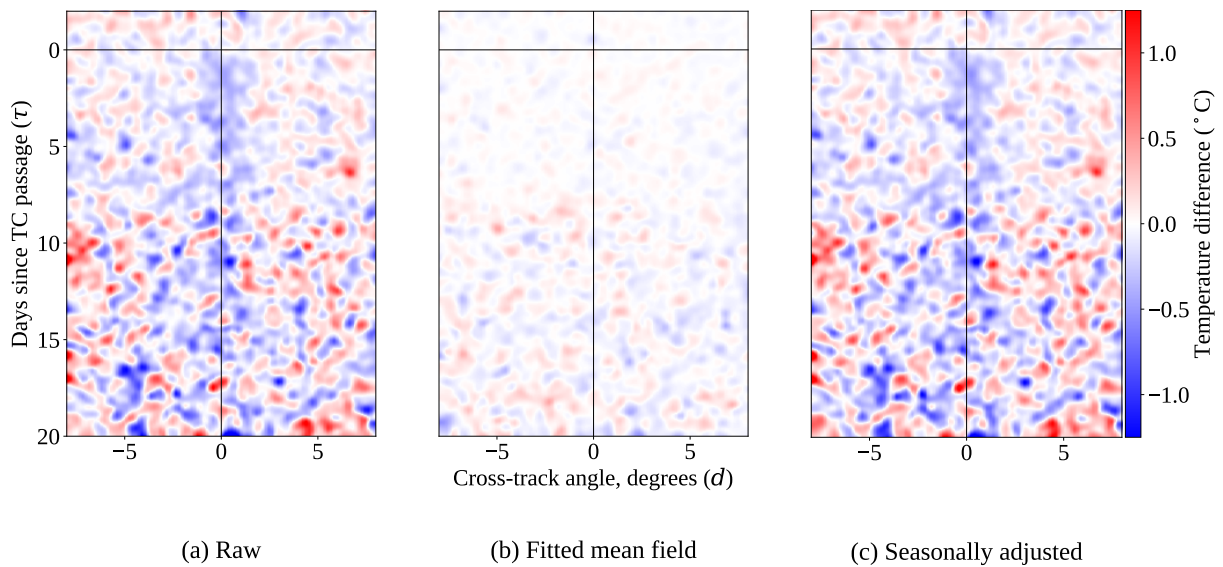

**Figure S19.** Pressure level: 190 dbar

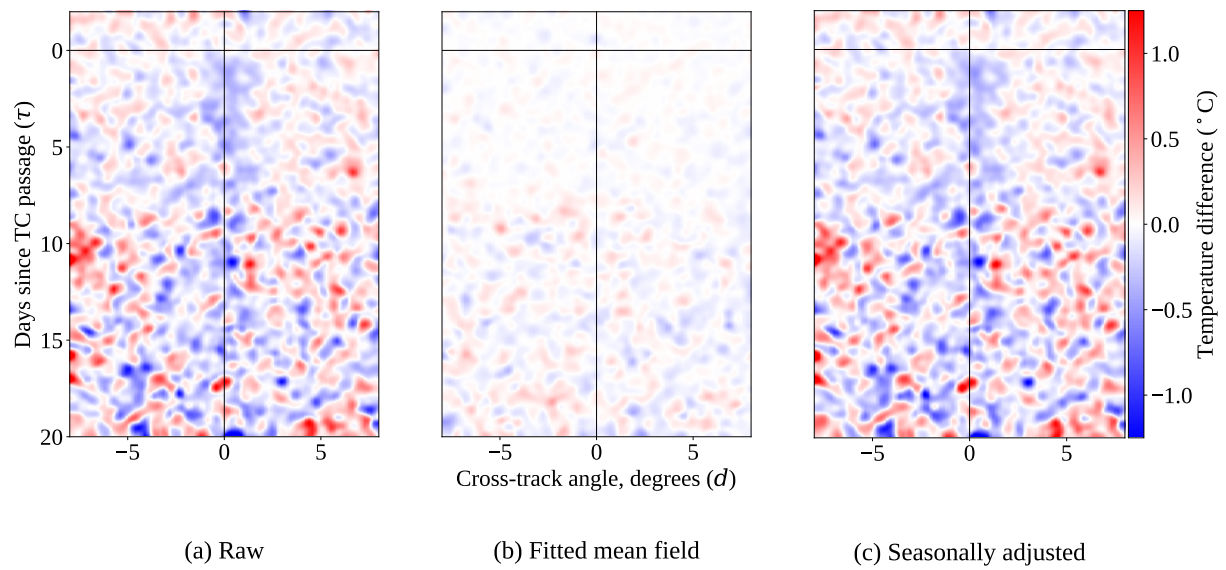

**Figure S20.** Pressure level: 200 dbar

## S2 Thin-plate spline fits

Here we present the thin-plate spline fits at all depths, for profile pairs incidental to TCs which were hurricane-strength (sustained winds of at least 64 knots) at time of passage.

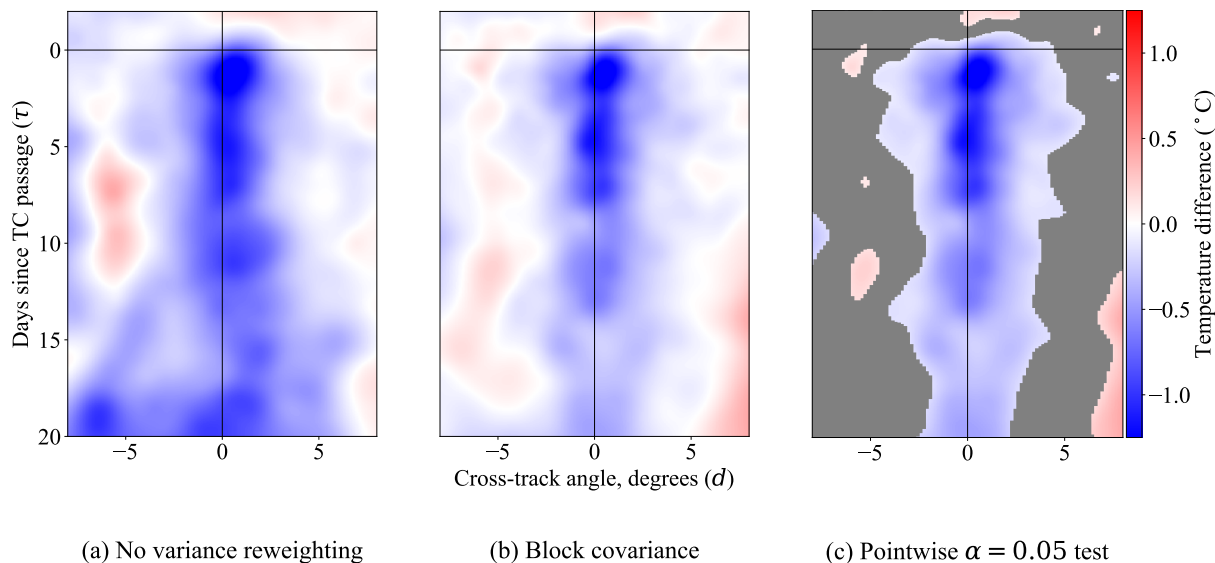

**Figure S21.** Pressure level: 10 dbar

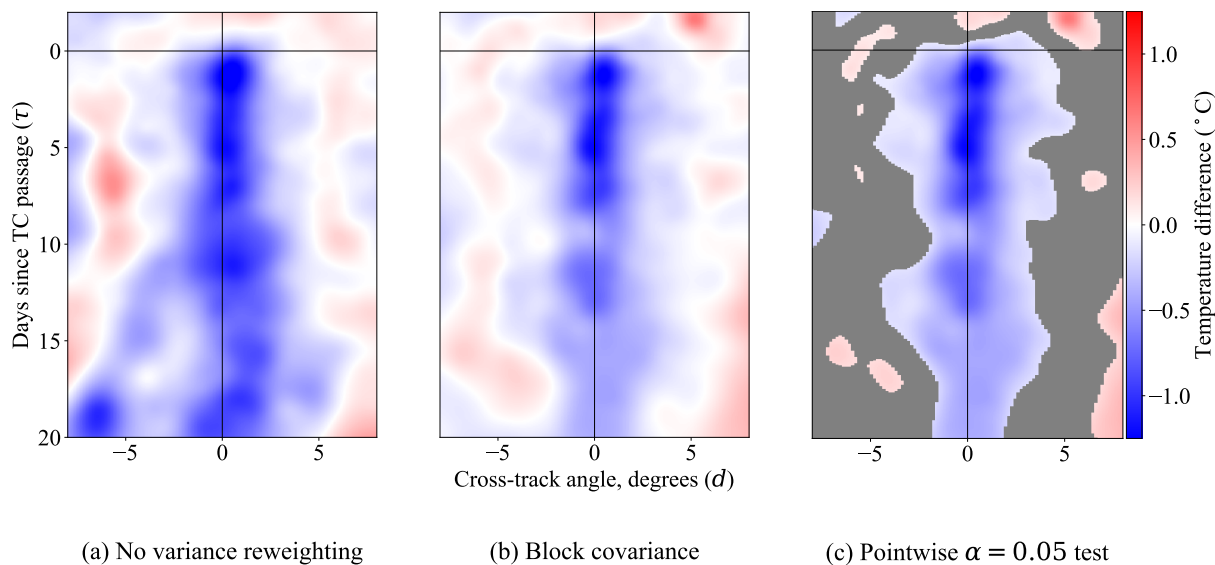

**Figure S22.** Pressure level: 20 dbar

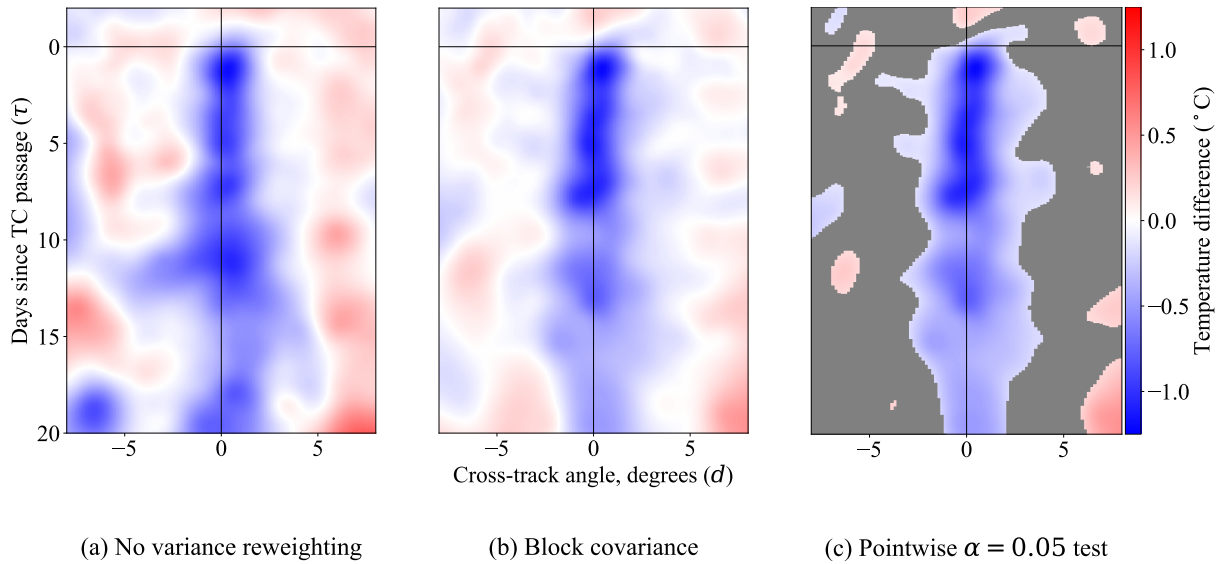

**Figure S23.** Pressure level: 30 dbar

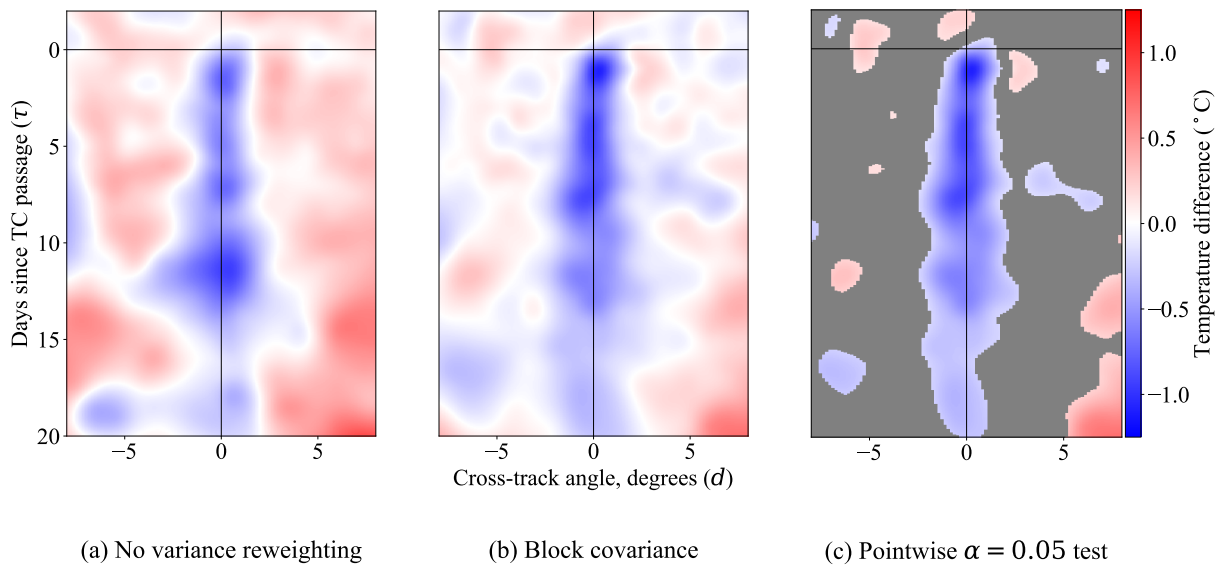

**Figure S24.** Pressure level: 40 dbar

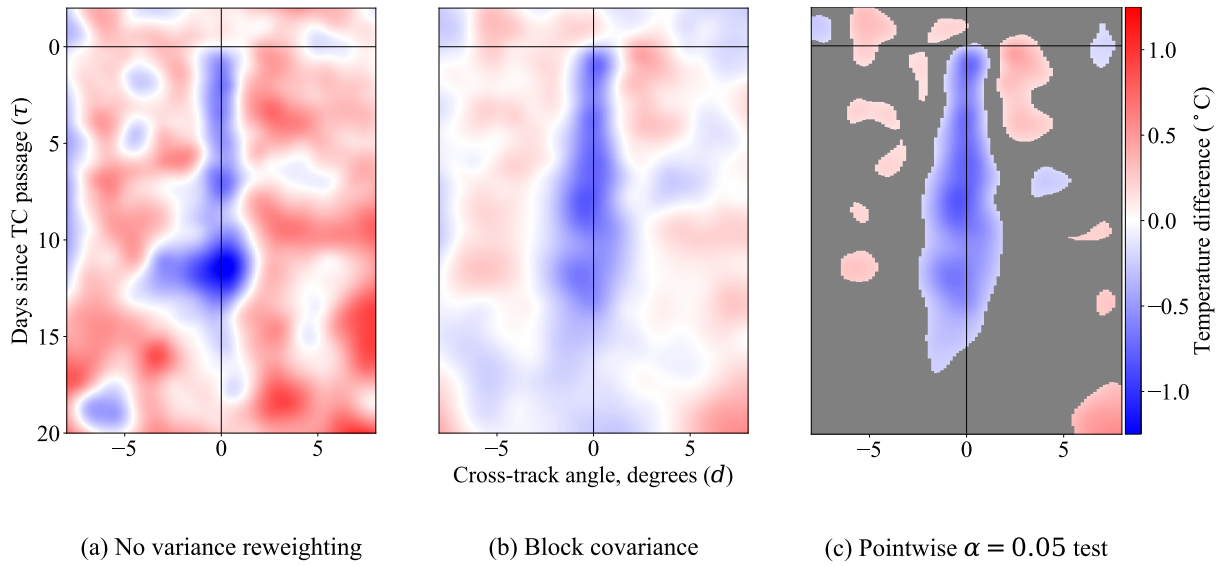

**Figure S25.** Pressure level: 50 dbar

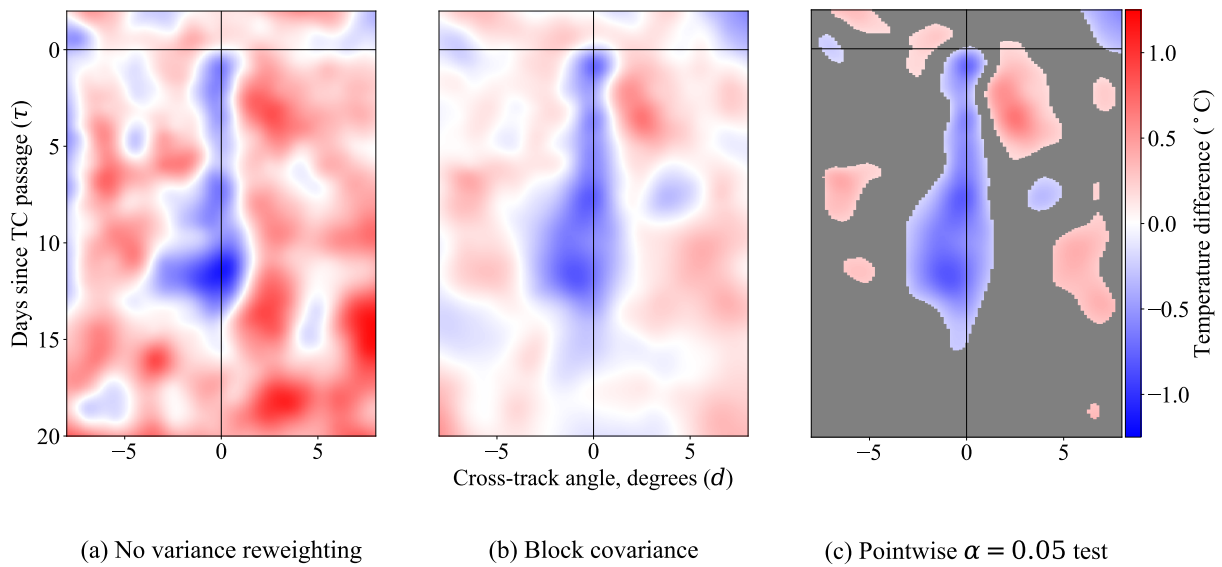

**Figure S26.** Pressure level: 60 dbar

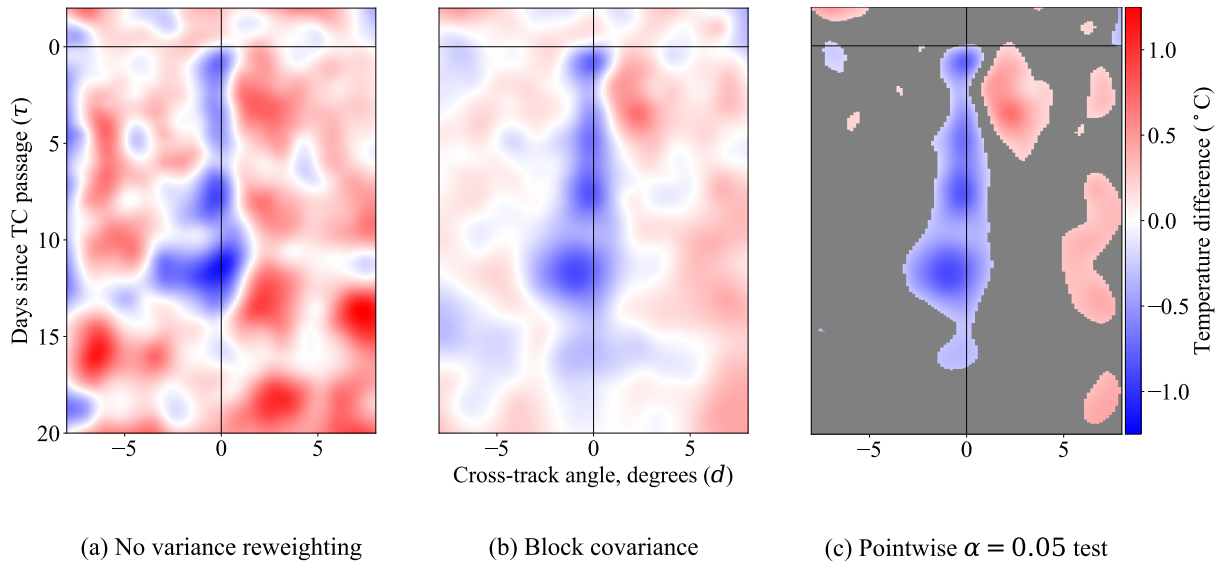

**Figure S27.** Pressure level: 70 dbar

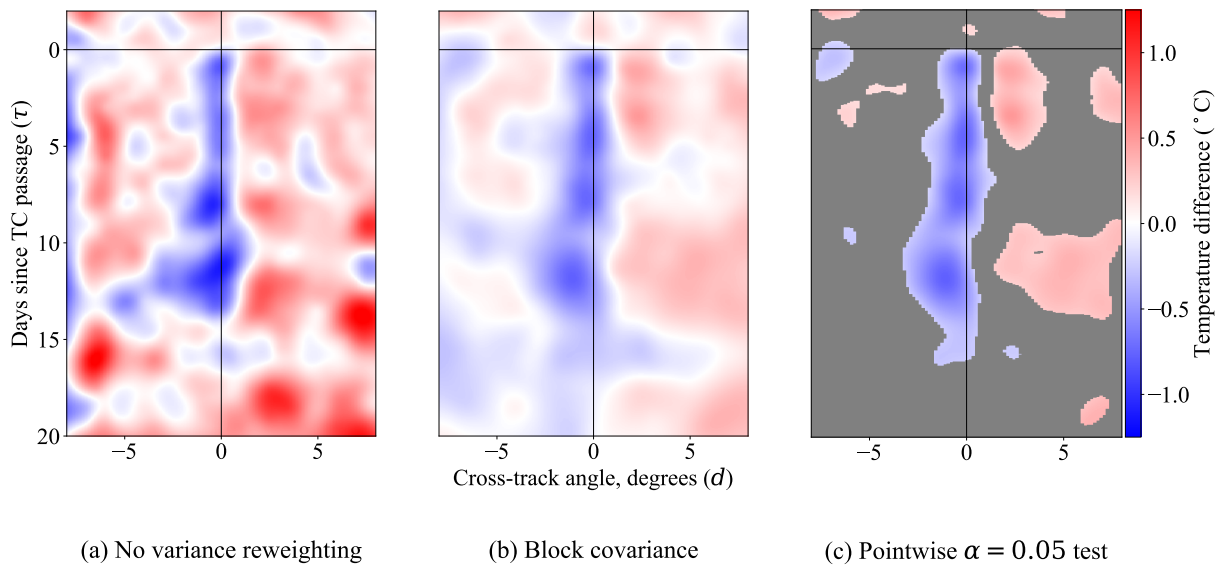

**Figure S28.** Pressure level: 80 dbar



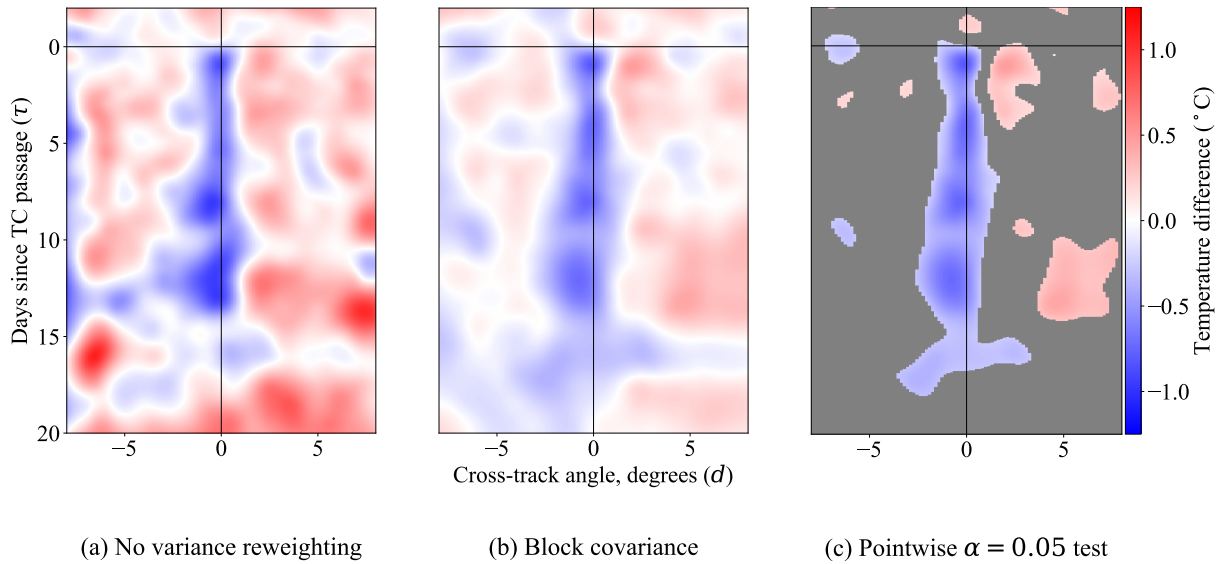

**Figure S29.** Pressure level: 90 dbar

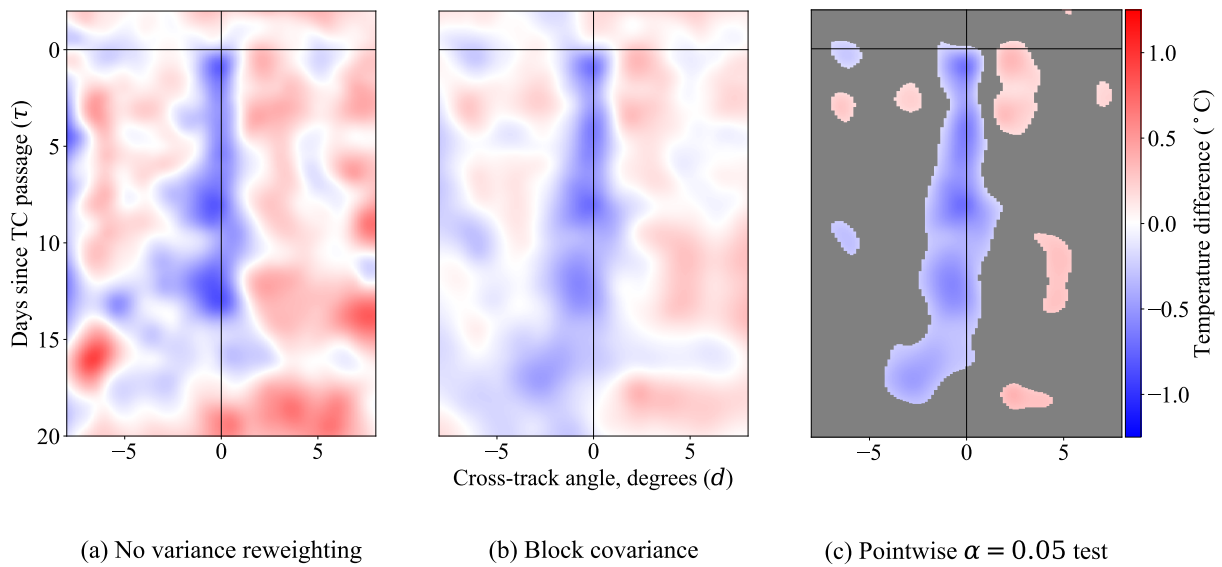

**Figure S30.** Pressure level: 100 dbar

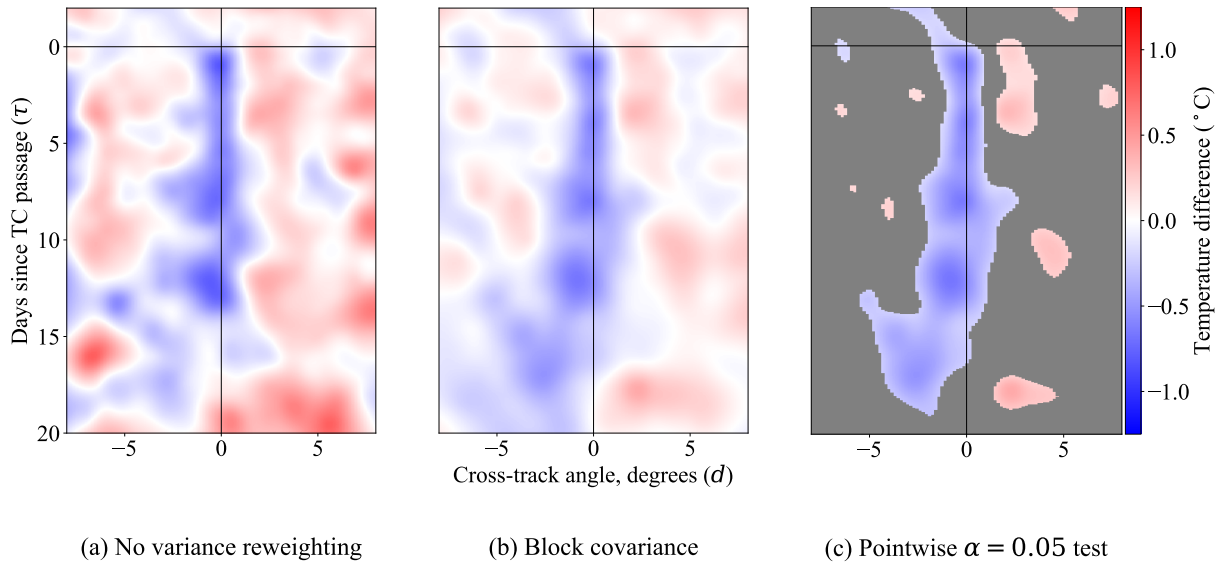

**Figure S31.** Pressure level: 110 dbar

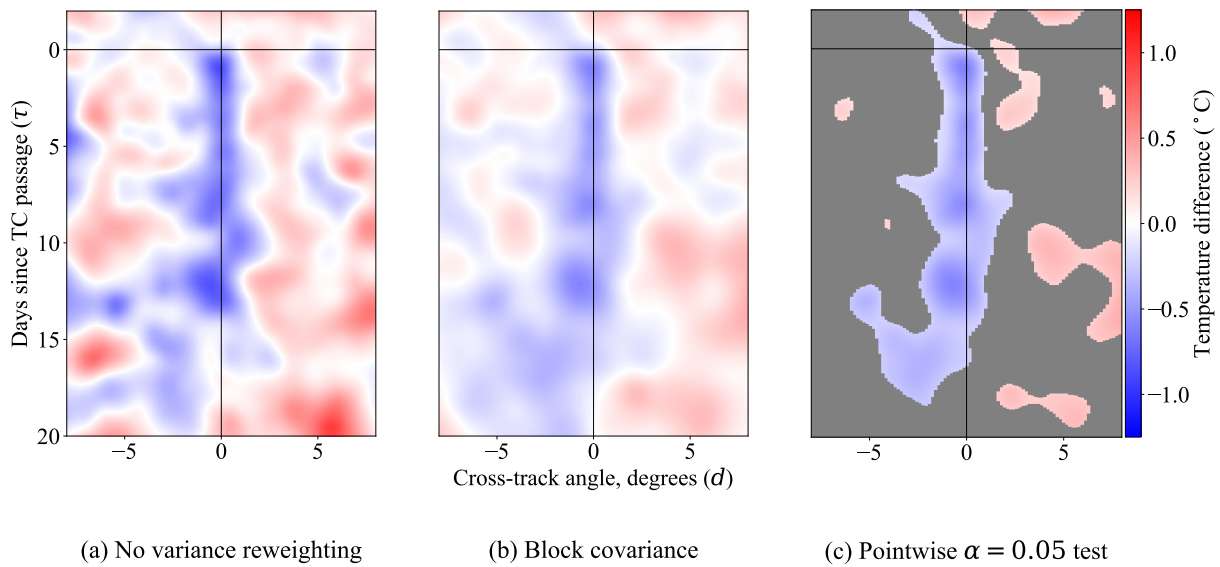

**Figure S32.** Pressure level: 120 dbar

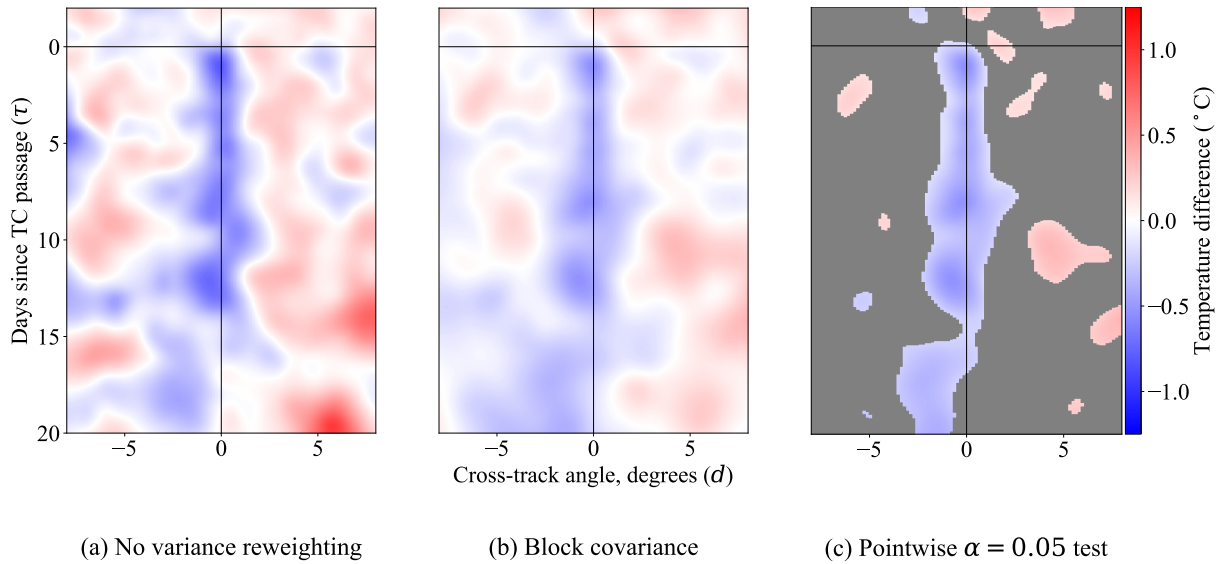

**Figure S33.** Pressure level: 130 dbar

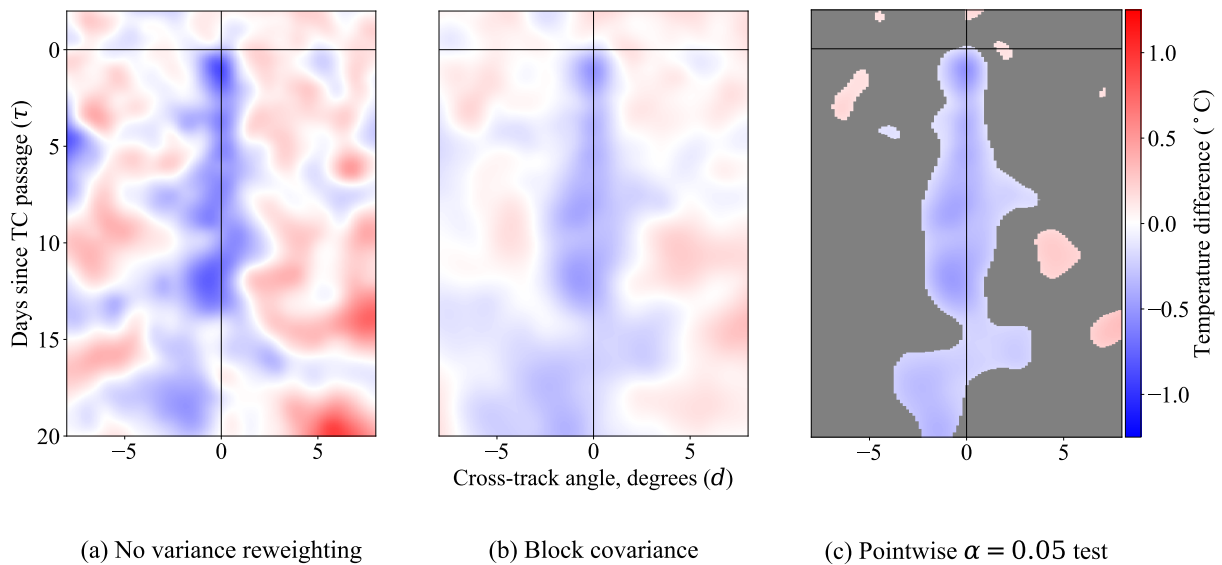

**Figure S34.** Pressure level: 140 dbar

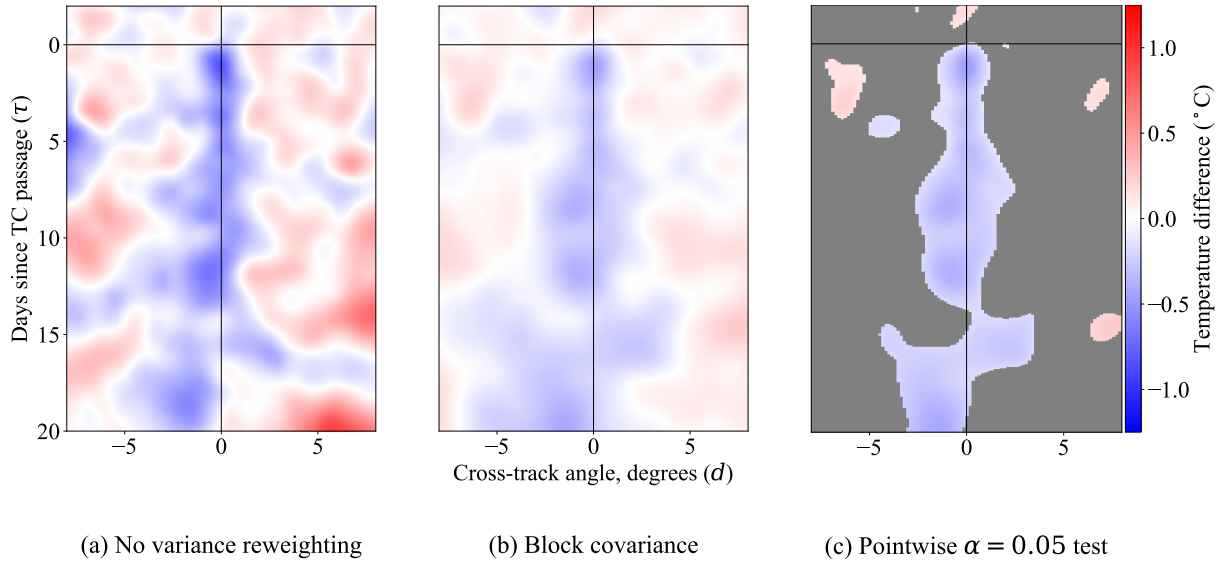

**Figure S35.** Pressure level: 150 dbar

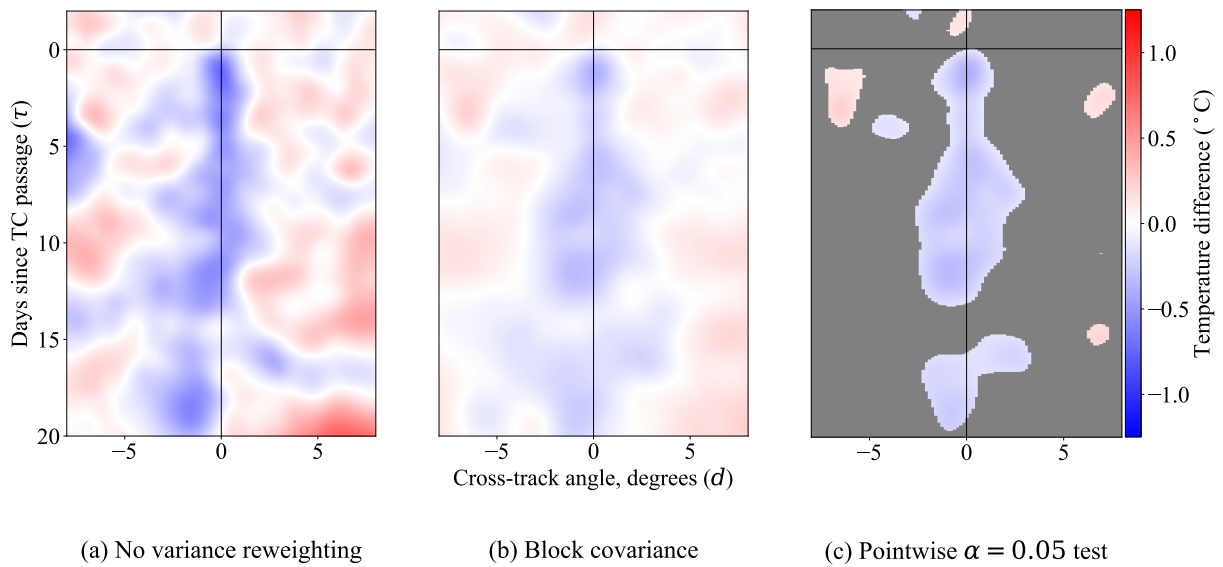

**Figure S36.** Pressure level: 160 dbar

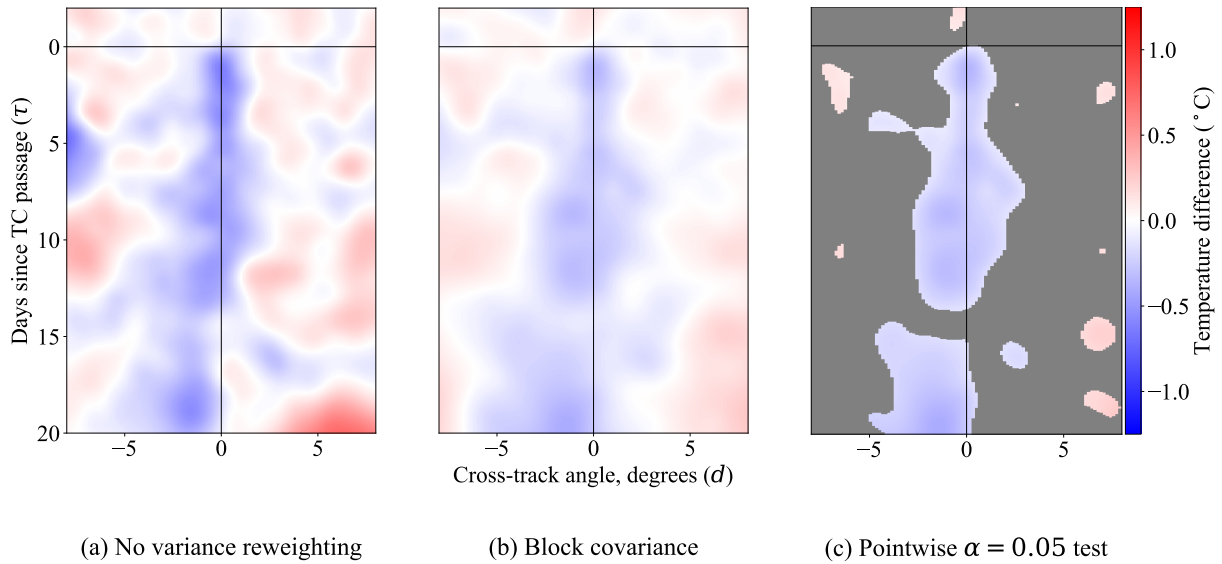

**Figure S37.** Pressure level: 170 dbar

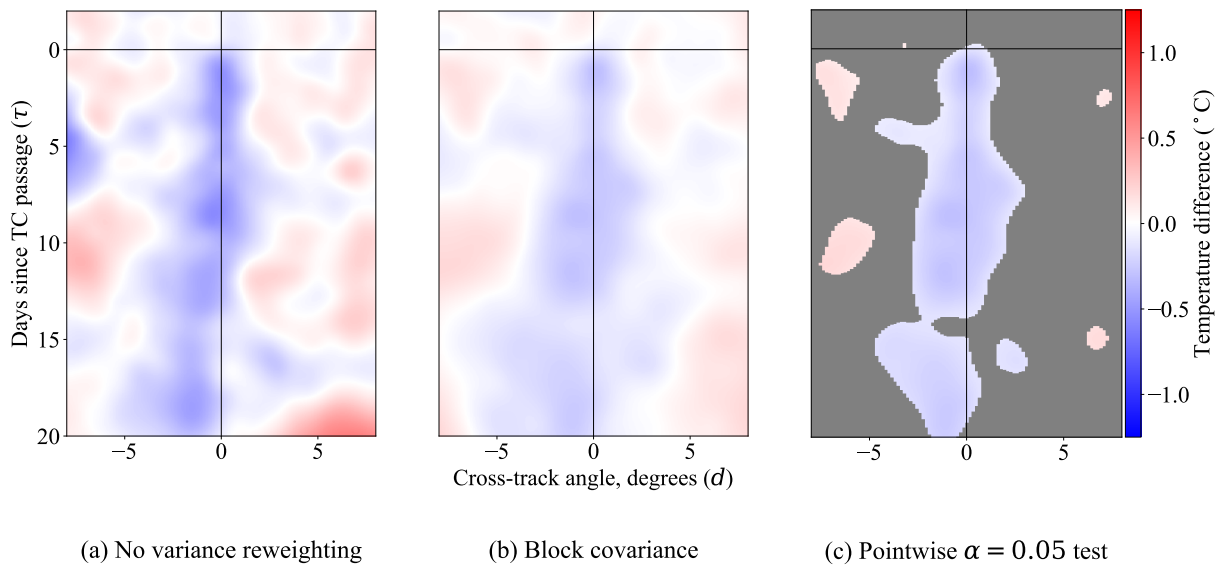

**Figure S38.** Pressure level: 180 dbar

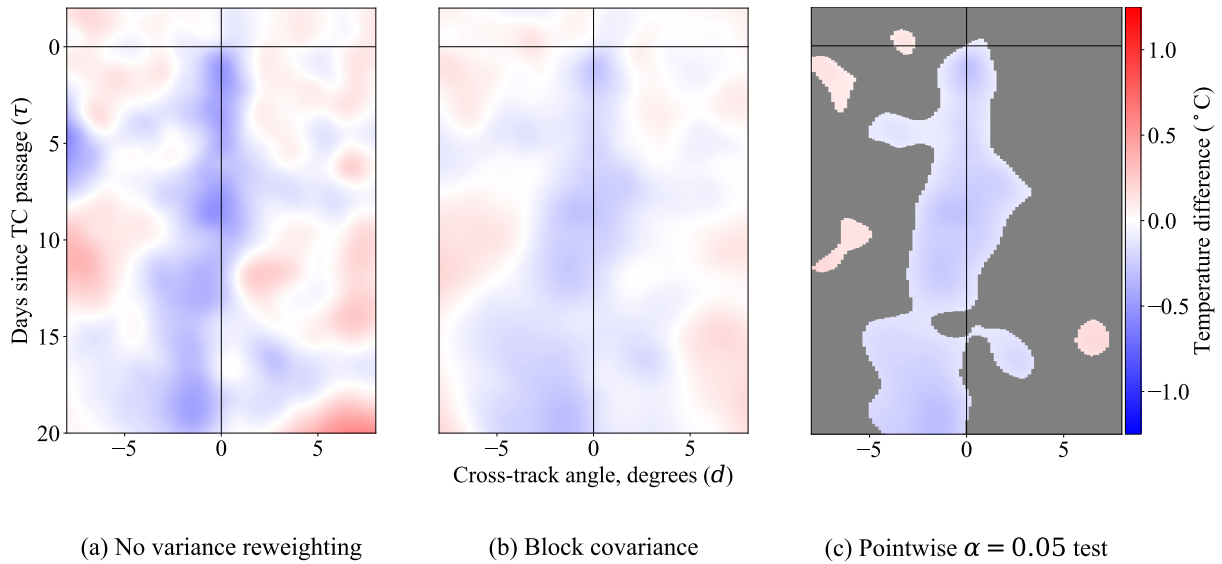

**Figure S39.** Pressure level: 190 dbar

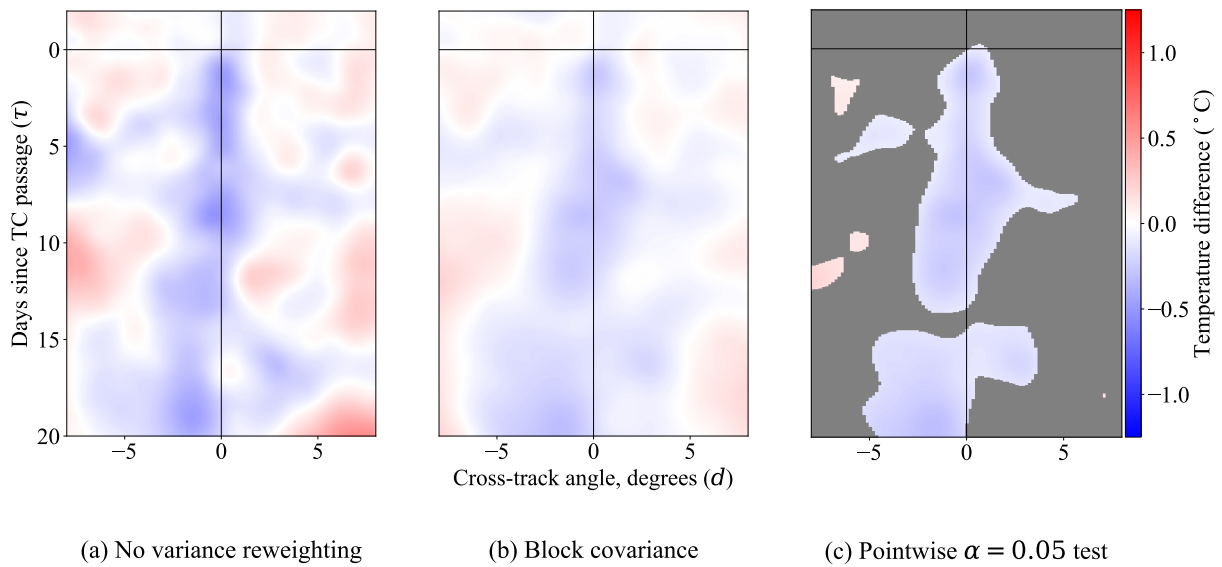

**Figure S40.** Pressure level: 200 dbar

### S3 Vertically averaged fits

10 Here we present the corresponding plots for the vertically averaged temperature difference analysis, as described in Section 5.6.

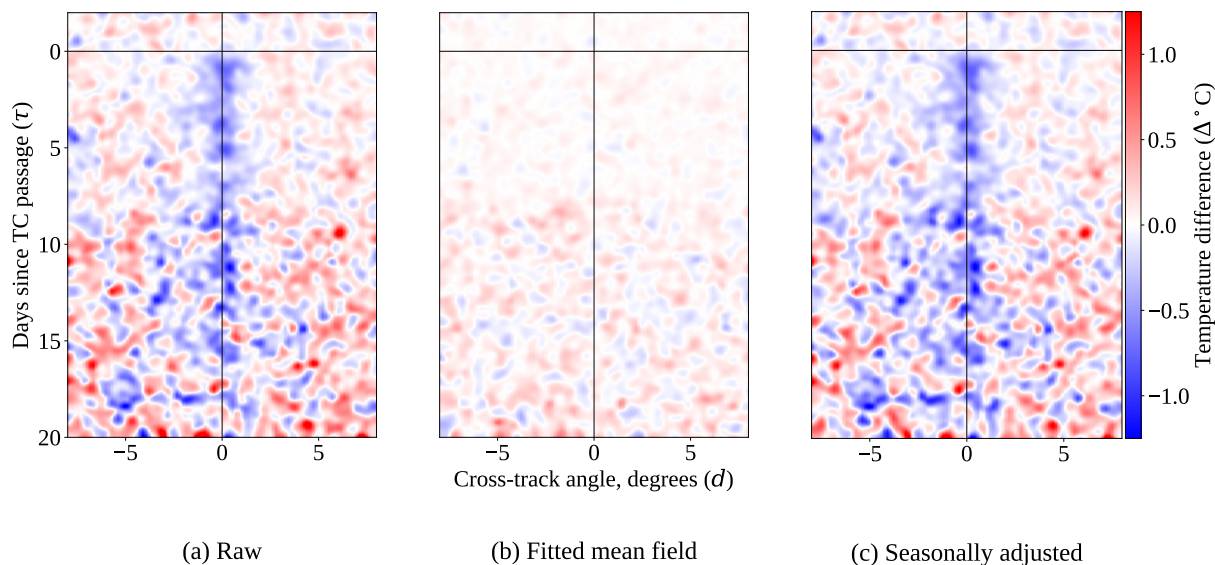

**Figure S41.** The temperature differences and fitted seasonal mean field are lightly smoothed by an isotropic Gaussian kernel smoother with a bandwidth of  $\sigma = 0.2$ .

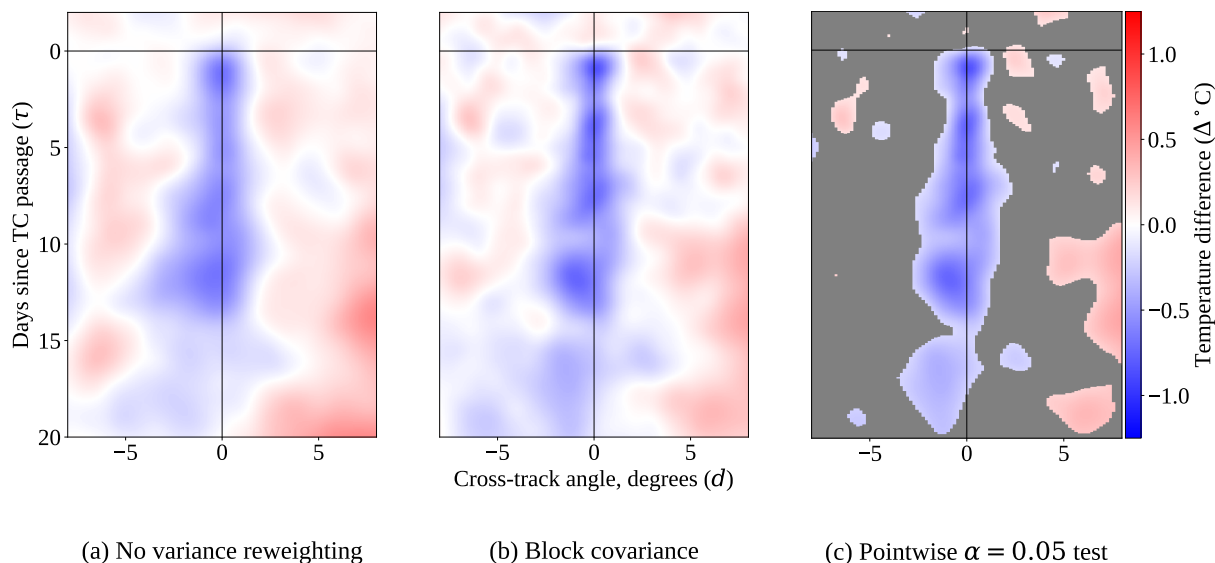

**Figure S42.** Thin-plate spline fits for profile pairs incidental to a TC of hurricane-strength (sustained windspeed of at least 64 knots) at time of TC passage.

## **S4 Seasonal mean field fits**

### **S4.1 Seasonal adjustments**

15 We plot the seasonal adjustment fitted to each profile pair in our dataset, at each pressure level  $z = 10, 20, \dots, 200$ , as well as for the vertically averaged temperature profiles. This set of plots complements Figure 5a and is provided for completeness. At pressure levels  $z = 30$  through  $z = 150$ , we observe an overall warming effect over the timespan of our data.



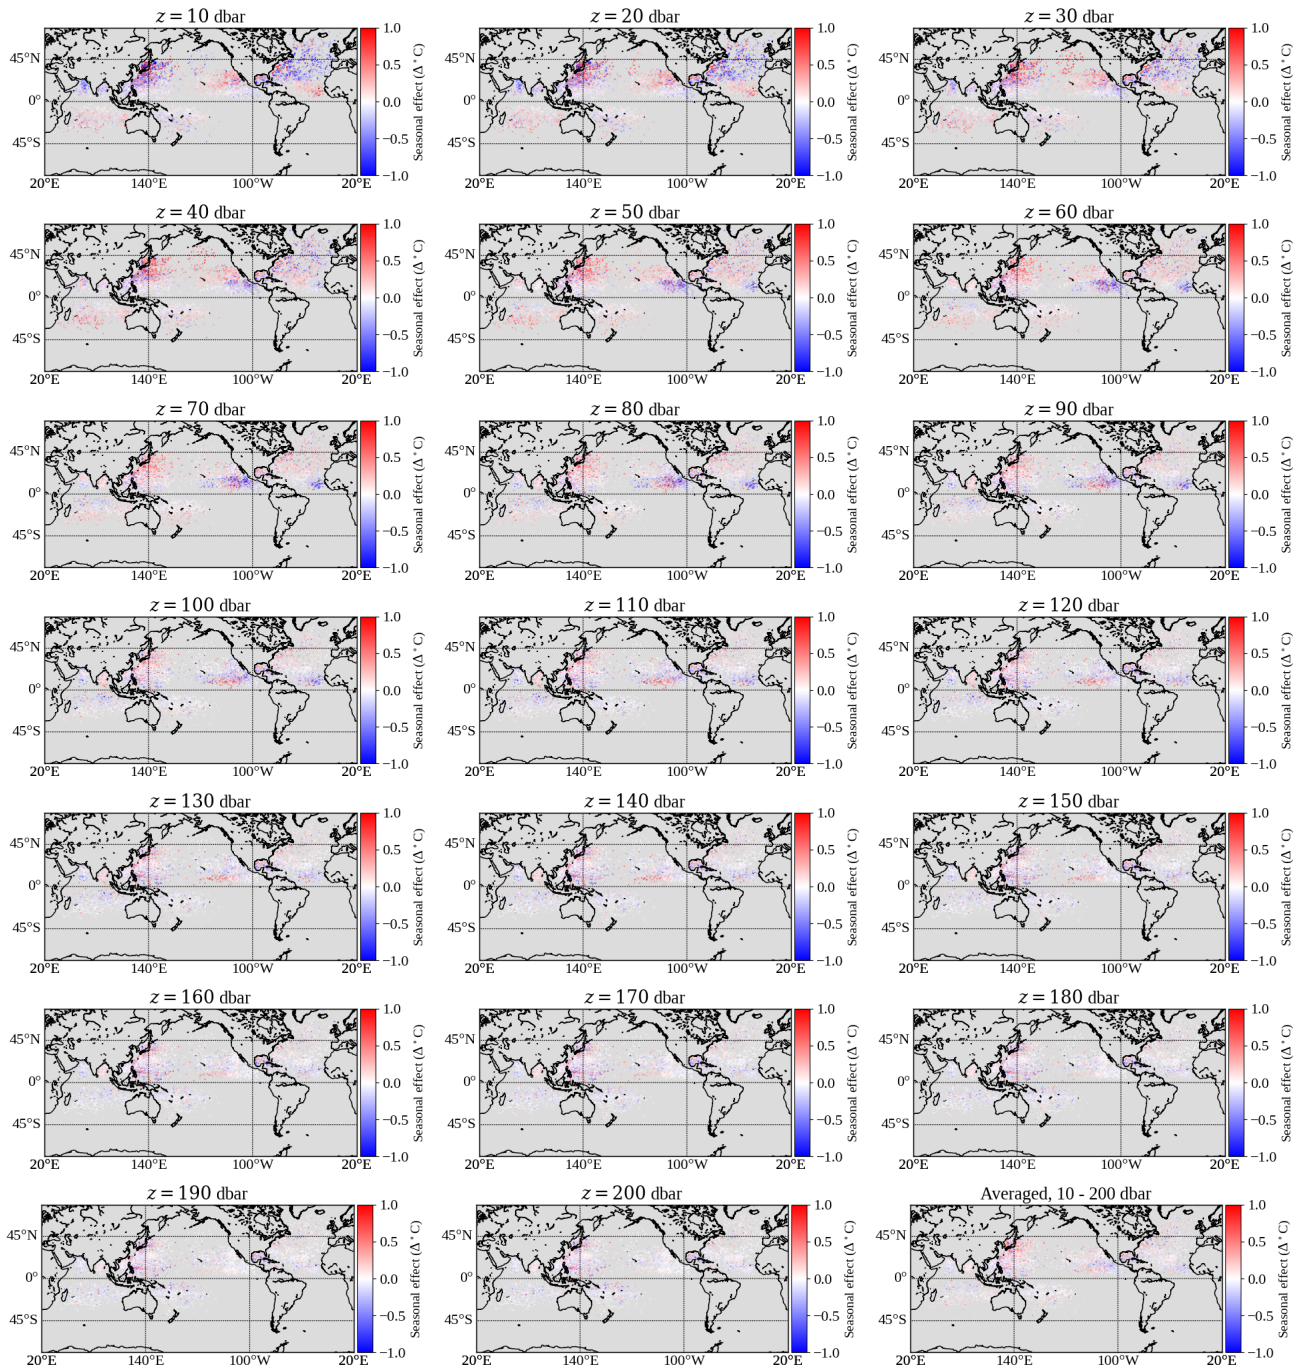

**Figure S43.** Seasonal adjustments at varying pressure levels.

## S5 Gaussian process model fits

In this section, we plot the Gaussian process model coefficients fitted in Section 4.4, as well as the variances for the seasonally adjusted temperature differences implied by these coefficients.

### 20 S5.1 Fitted $\phi$ coefficients

Here we plot the  $\phi$  parameters, fitted through maximum likelihood estimation at each pressure level  $z = 10, 20, \dots, 200$  and for the vertically averaged temperature profiles. Note that the colorscale is logarithmic.

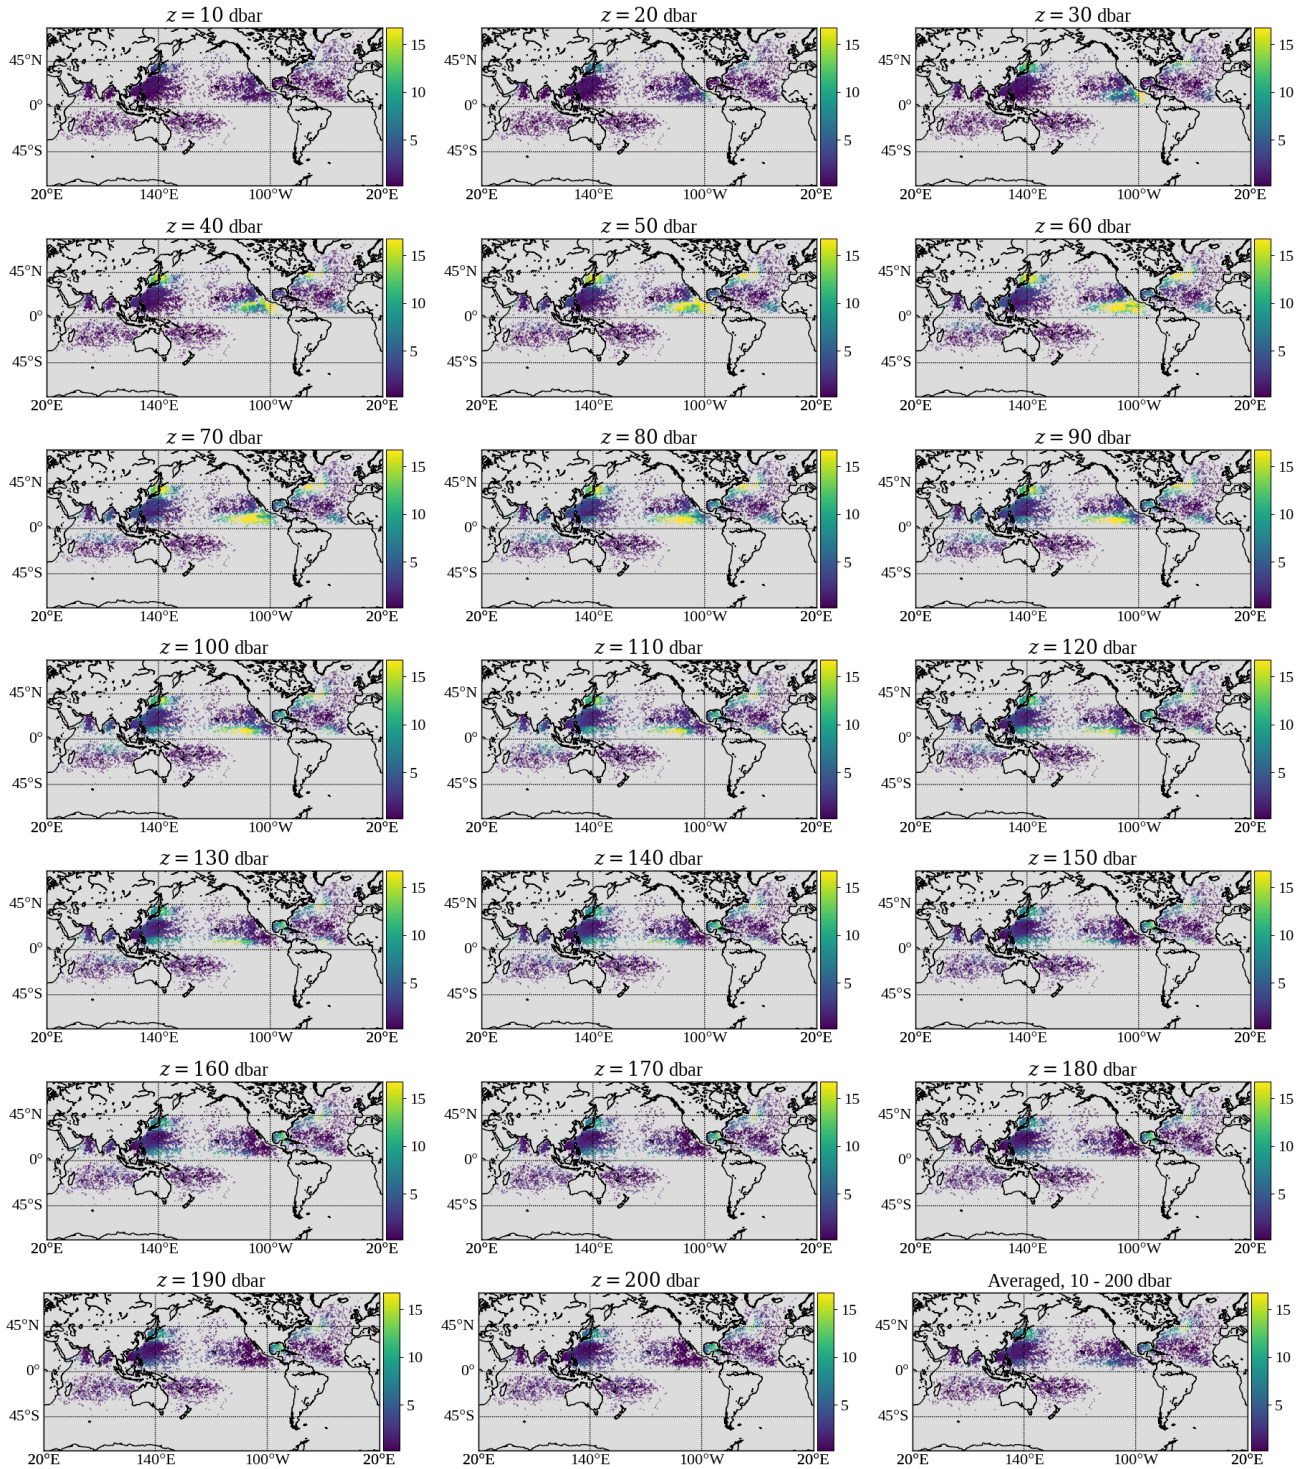

**Figure S44.** Fitted  $\phi$  coefficients at varying pressure levels.

## S5.2 Fitted $\theta_t$ coefficients

Here we plot the  $\theta_t$  parameters, fitted through maximum likelihood estimation at each pressure level  $z = 10, 20, \dots, 200$  and  
25 for the vertically averaged temperature profiles.

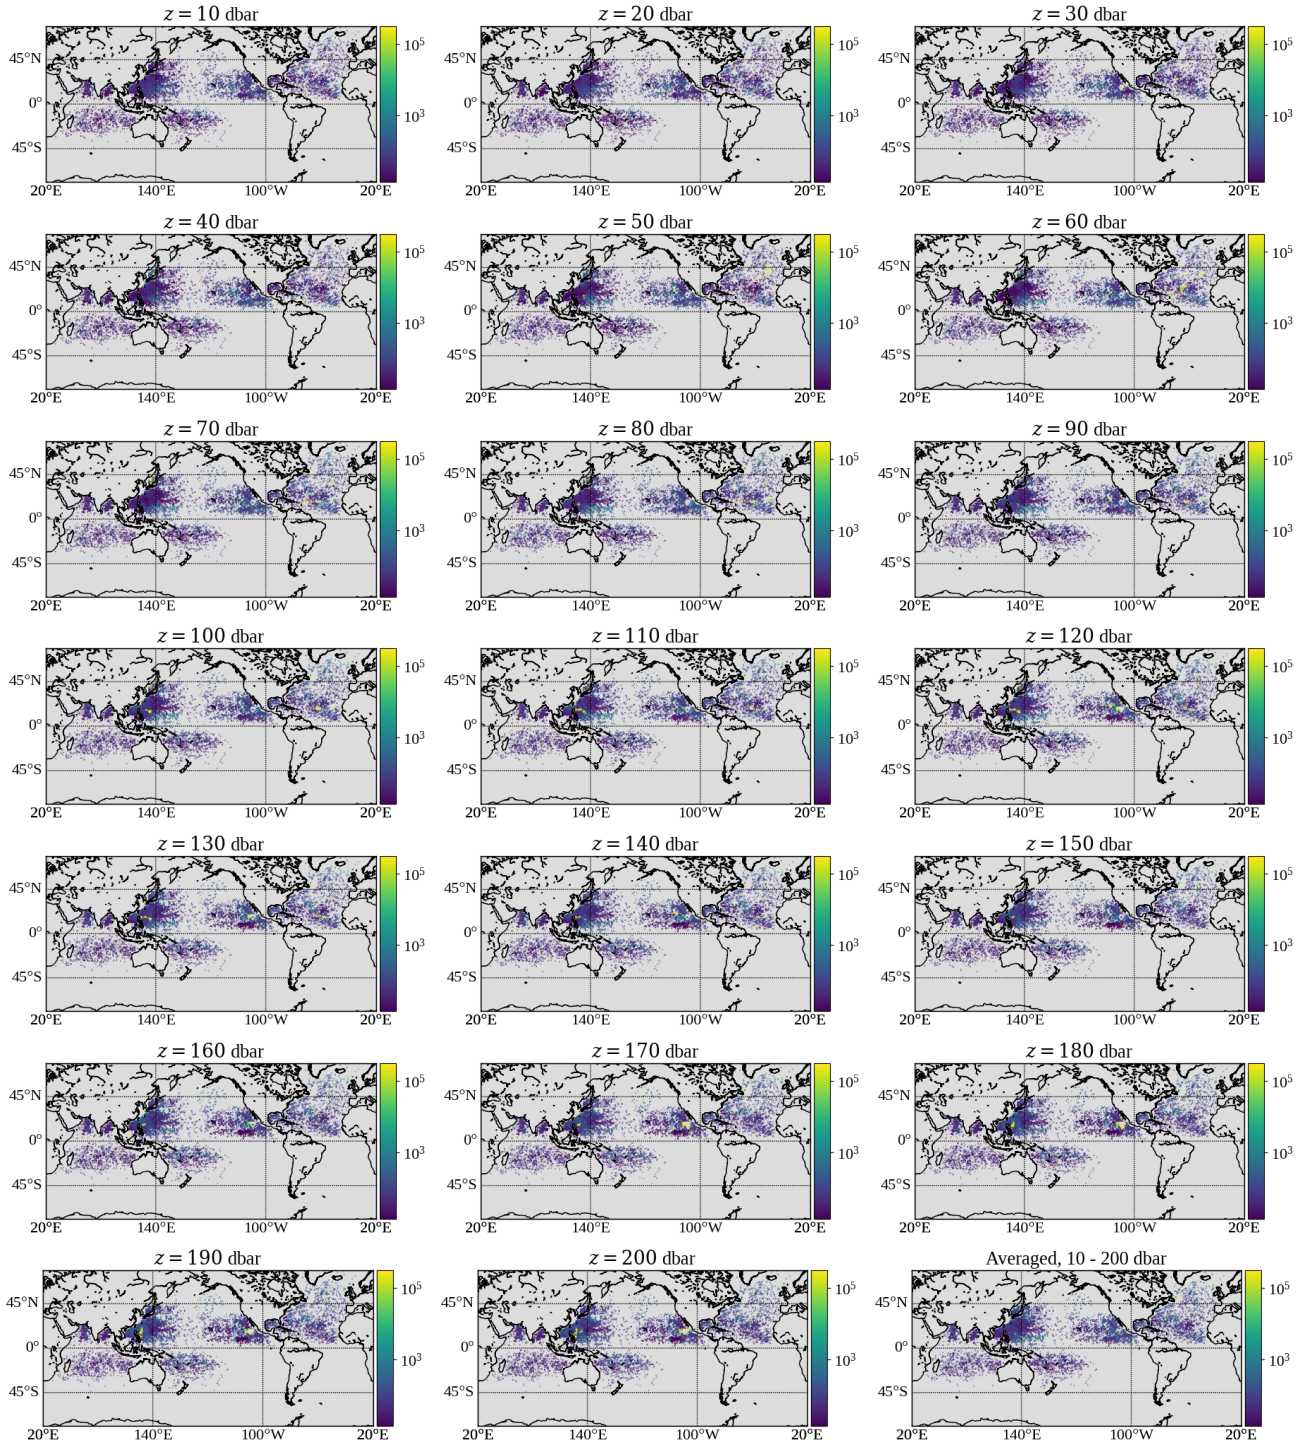

Figure S45. Fitted  $\theta_t$  coefficients at varying pressure levels.

### S5.3 Fitted $\sigma$ coefficients

Here we plot the  $\sigma$  parameters, fitted through maximum likelihood estimation at each pressure level  $z = 10, 20, \dots, 200$  and for the vertically averaged temperature profiles.

The fitted coefficients exhibit a spatial smoothness, suggesting a relative stability across the locally fitted models.

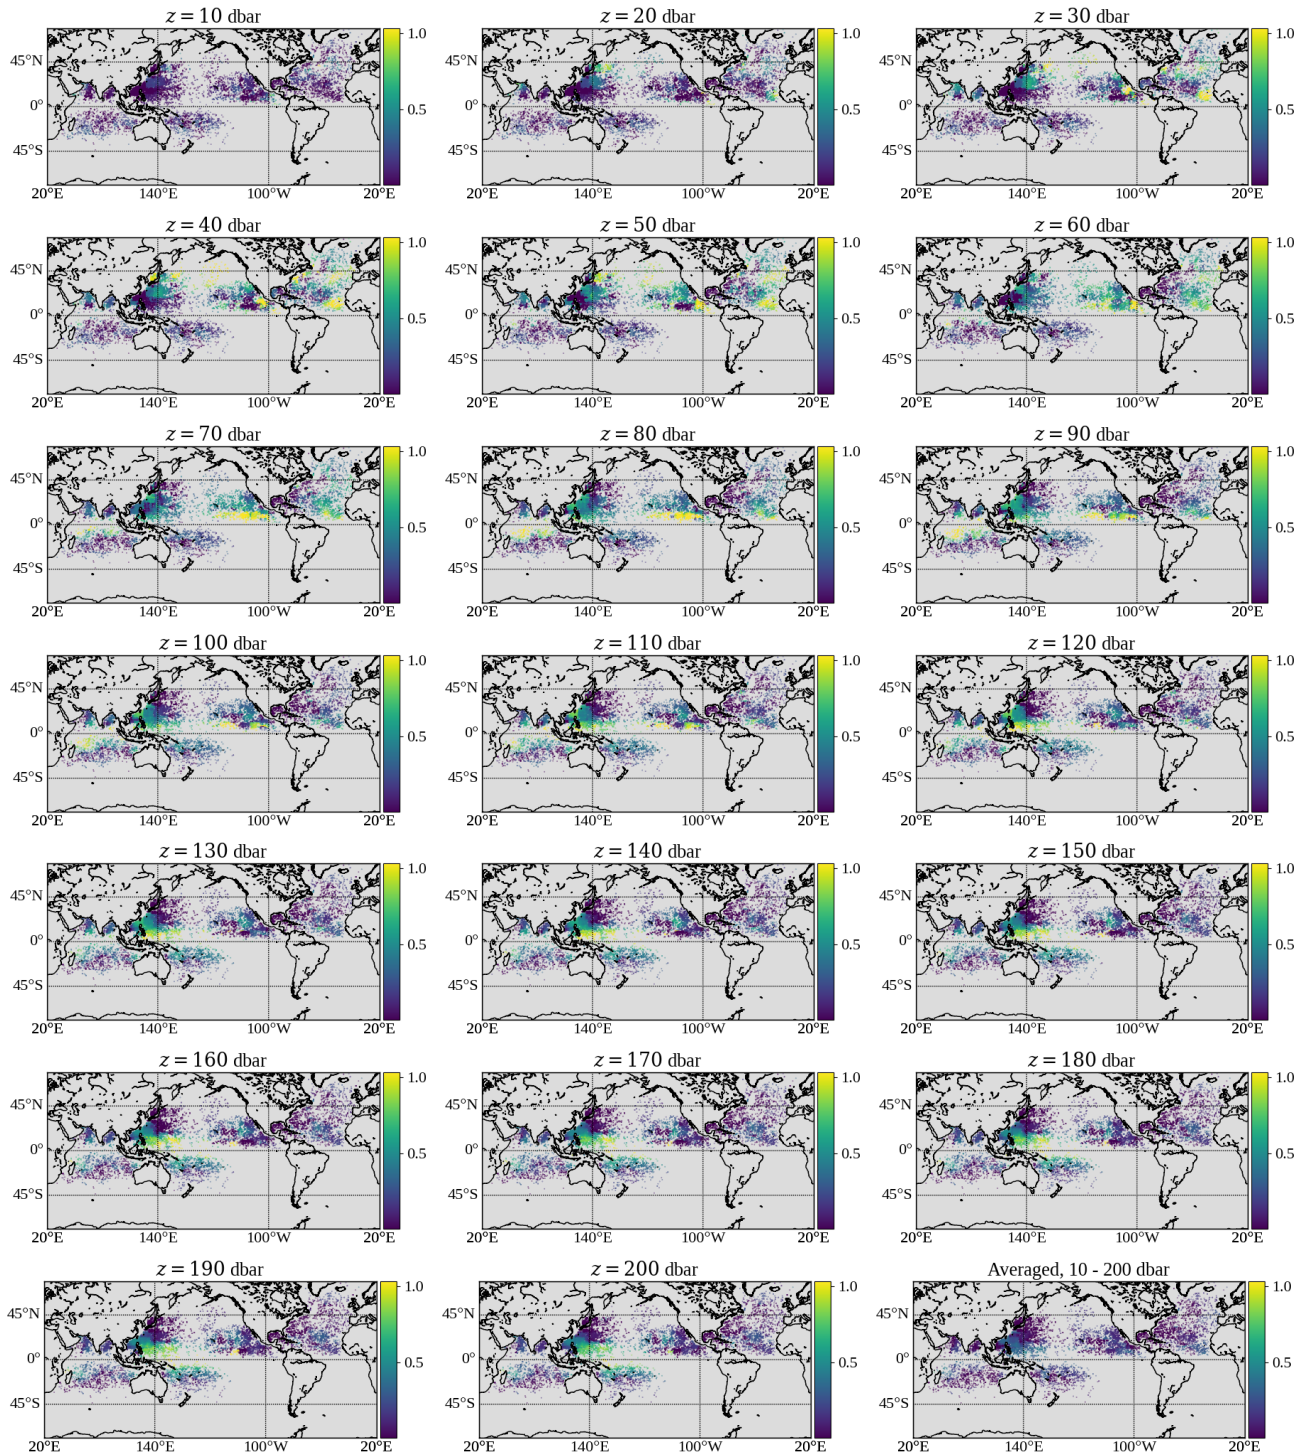

Figure S46. Fitted  $\sigma$  coefficients at varying pressure levels.

## 30 S5.4 Fitted variances

Here we plot the variances for the seasonally adjusted temperature differences, as fitted by way of the Gaussian process model of Section 4.4, for each of the profile pairs in our dataset. These variances are fitted at each pressure level  $z = 10, 20, \dots, 200$ , as well as for the vertically averaged temperature profiles.

Overall, we observe that the fitted variances are relatively homogeneous. Profile pairs with larger fitted variance are down-  
35 weighted in the final thin-plate spline fit of Section 4.5.



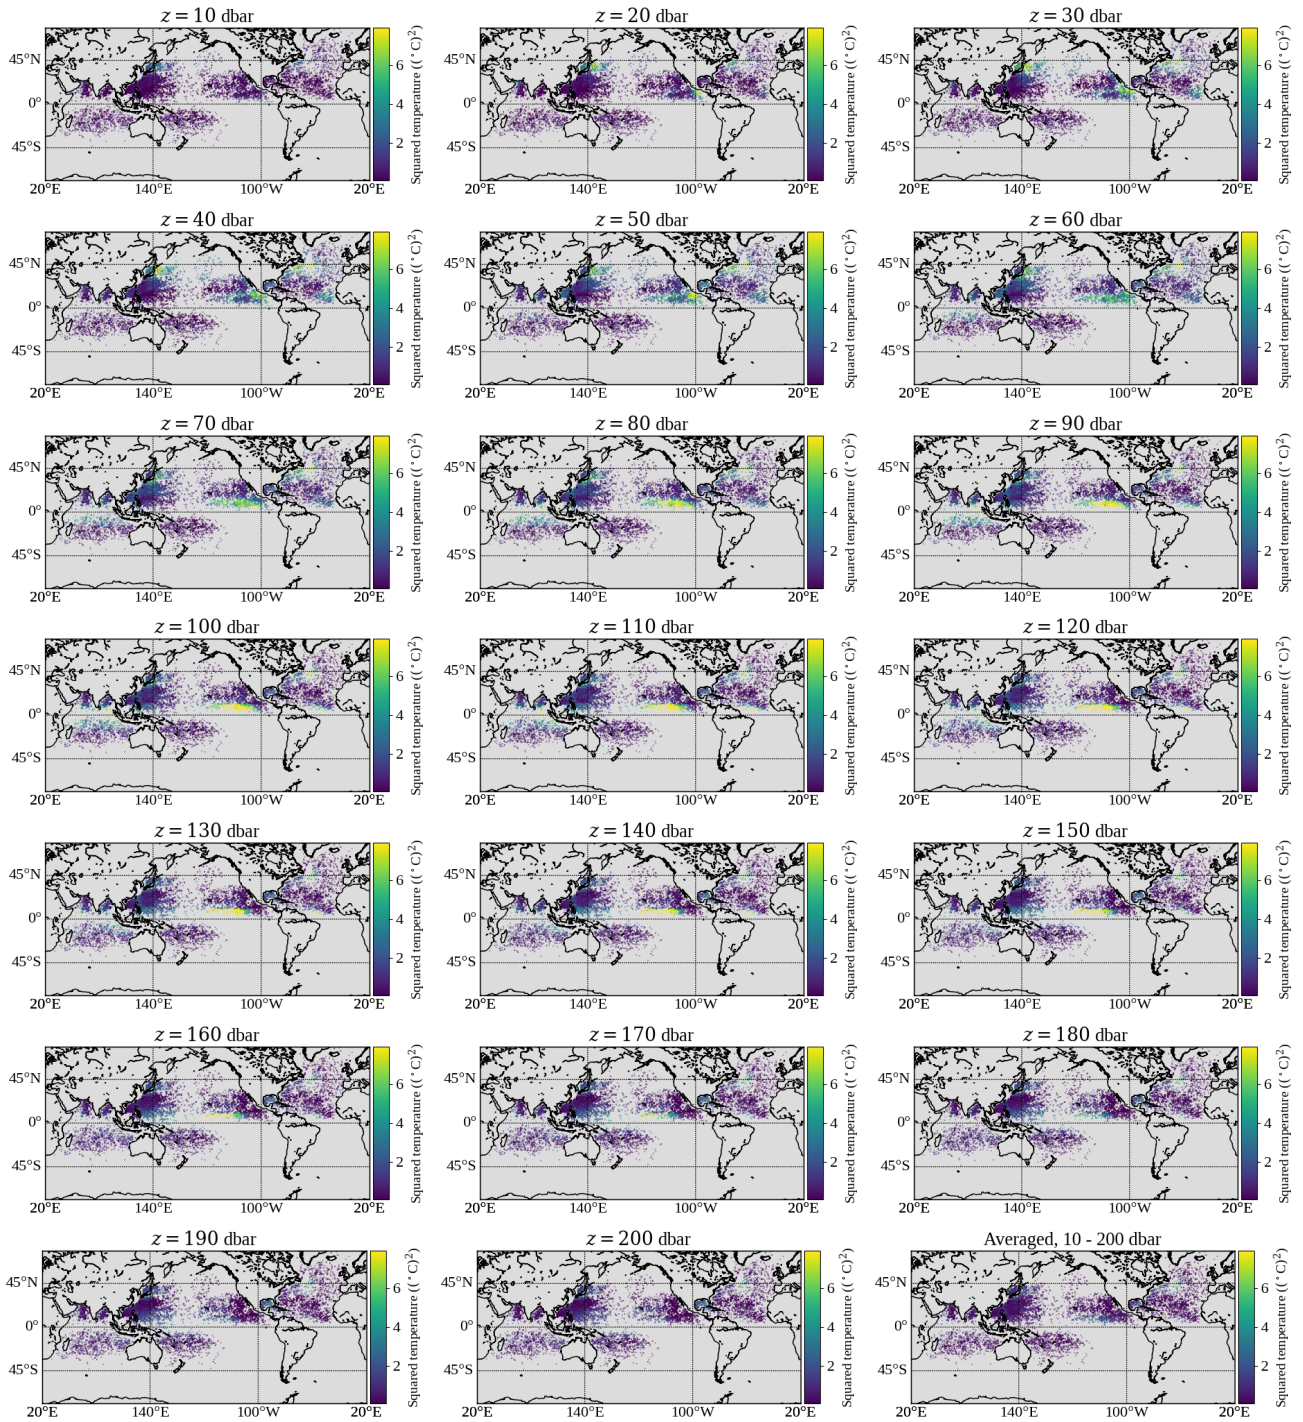

**Figure S47.** Fitted variances at varying pressure levels.
